# Supplementary material for: Oligoene and cyanine features of tetracyano quinoidal oligothiophenes
Source: Royal Society of Chemistry journal article supplement (doi:10.1039/d1tc01436f), 2021-01-01
Supplement: d1tc01436f1.pdf [file d1tc01436f1.pdf]

## **Oligoene and Cyanine Features of Tetracyano Quinoidal Oligothiophenes**

Sergio Moles Quintero, José Luis Zafra, Keitaro Yamamoto,  
Yoshio Aso, Yutaka Ie, Juan Casado

### **Supporting Information**

#### **Table of Contents**

|                                                          |            |
|----------------------------------------------------------|------------|
| <b>Part 1. Quantum Chemistry Calculations</b>            | <b>S2</b>  |
| <b>Part 2. UV-Vis-NIR and IR Spectroelectrochemistry</b> | <b>S3</b>  |
| <b>Part 3. UV-Vis-NIR and IR Spectroelectrochemistry</b> | <b>S4</b>  |
| <b>Part 4. Deconvolution Fitting Parameters</b>          | <b>S5</b>  |
| <b>Part 5. Optimized Coordinates</b>                     | <b>S6</b>  |
| <b>Part 4. Refences</b>                                  | <b>S47</b> |

## Part 1. Quantum Chemistry Calculations.

All geometry optimizations of the ground state of both neutral and charged species have been performed within the density functional theory (DFT) framework with B3LYP energy functional and the 6-31G\*\* basis set using the Gaussian 16 software<sup>1,2,3</sup>.

The computation of diradical index ( $\gamma_0$ ) of **B2-6TQ** has been carried out with de restricted active space spin-flip (RAS-SF) method<sup>4</sup>. The diradical index has been quantified as the occupation of the Lowest Unoccupied Natural Orbital (LUNO). This calculation has been done with the Q-Chem program<sup>5</sup>.

Vertical transition energies were computed with the time-dependent version of DFT (TDDFT)<sup>6,7</sup>.

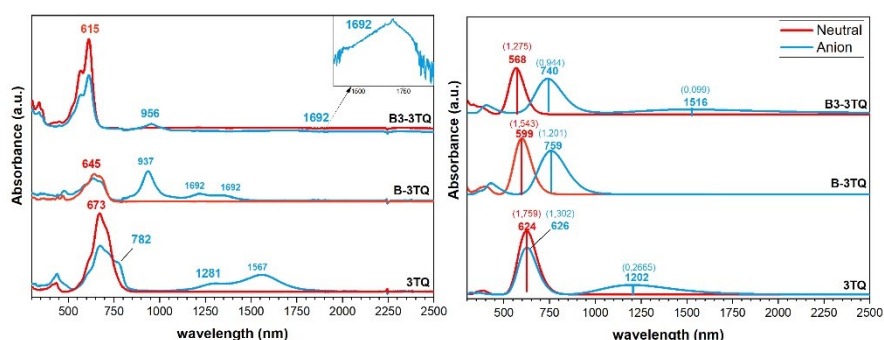

**Figure S1.** Left: UV-Vis-NIR electronic absorption spectra of neutrals (red lines) and anions (blue lines) of **B3-3TQ** (top), **B-3TQ** (middle) and **3TQ** (bottom). Right: Simulated UV-Vis-NIR spectra computed in neutrals (red lines) and anions (blue lines) of **B3-3TQ** (top), **B-3TQ** (middle) and **3TQ** (bottom). The oscillator strengths are indicated between brackets.

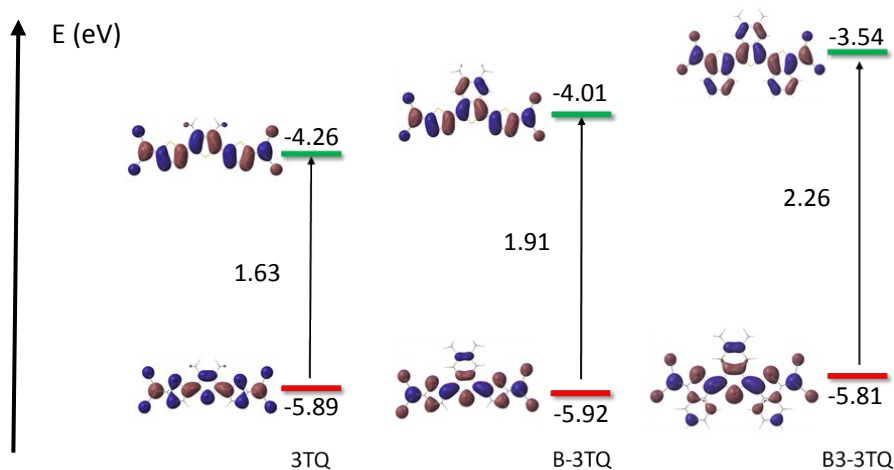

**Figure S2.** Frontier molecular orbitals and their energy in eV computed at the B3LYP/6-31G\*\* level of theory. Highest Occupied Molecular Orbital, HOMO (red lines); Lowest Unoccupied Molecular Orbital, LUMO (green lines).

## Part 2. UV-Vis-NIR and IR Spectroelectrochemistry.

Electrochemical experiments have been conducted in dichloromethane at room temperature by using 0.1 M tetrabutyl ammonium hexafluorophosphate,  $\text{Bu}_4\text{NPF}_6$ , as the supporting electrolyte.

In situ IR and UV-Vis-NIR spectroelectrochemical studies were conducted on the VERTEX 70 FT-IR spectrometer and on the Varian Cary 5000 UV-Vis-NIR Spectrophotometer, respectively. A C3 epsilon potentiostat from BASi was used for the electrolysis using a thin layer cell from a demountable omni cell from Specac. In this cell a three electrodes system was coupled to conduct in situ spectroelectrochemistry. A Pt gauze was used as the working electrode, a Pt wire was used as the counter electrode, and an Ag wire was used as the pseudo-reference electrode. The spectra were collected at a constant potential electrolysis and the potentials were changed in interval of 15 mV. The electrochemical medium used was 0.1  $\text{Bu}_4\text{NPF}_6$  in fresh distilled dichloromethane, at room temperature with sample concentrations of  $10^{-3}$  M.

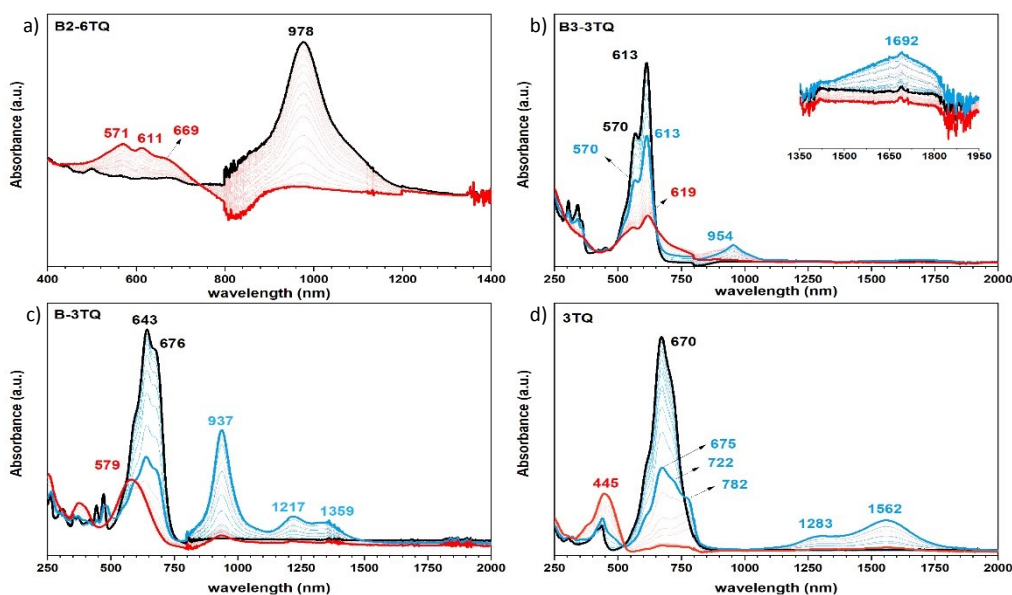

**Figure S3.** UV-Vis-NIR spectroelectrochemical reduction processes of **B2-6TQ** a), **B3-3TQ** b), **B-3TQ** c), **3TQ** d) and in 0.1 M  $\text{Bu}_4\text{NPF}_6$  in dichloromethane at room temperature. Black lines correspond to the spectra of neutral species, blue lines correspond to the anionic species and red line correspond to the dianionic species. Dashed light colour lines correspond to the intermediate spectra between the former species.

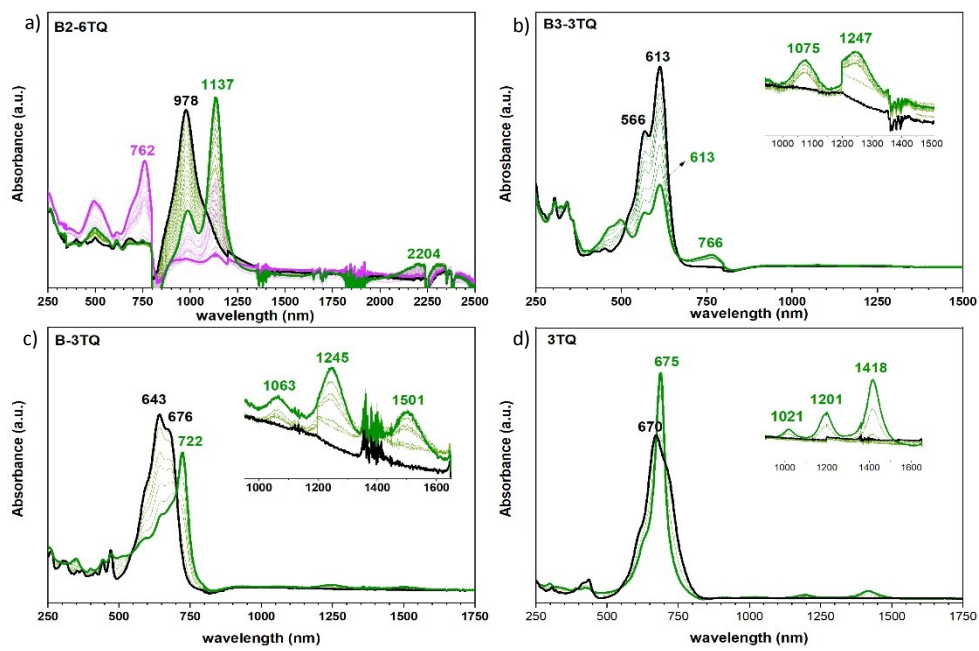

**Figure**  
**S4.**  
 UV-  
 Vis-  
 NIR

spectroelectrochemical oxidation processes of **B2-6TQ** a), **B3-3TQ** b), **B-3TQ** c) and **3TQ** d) in 0.1 M  $\text{Bu}_4\text{NPF}_6$  in dichloromethane at room temperature. Black lines correspond to the spectra of neutral species, green lines correspond to the cationic species and pink line corresponds to the dicationic species. Dashed light colour lines correspond to the intermediate spectra between the former species.

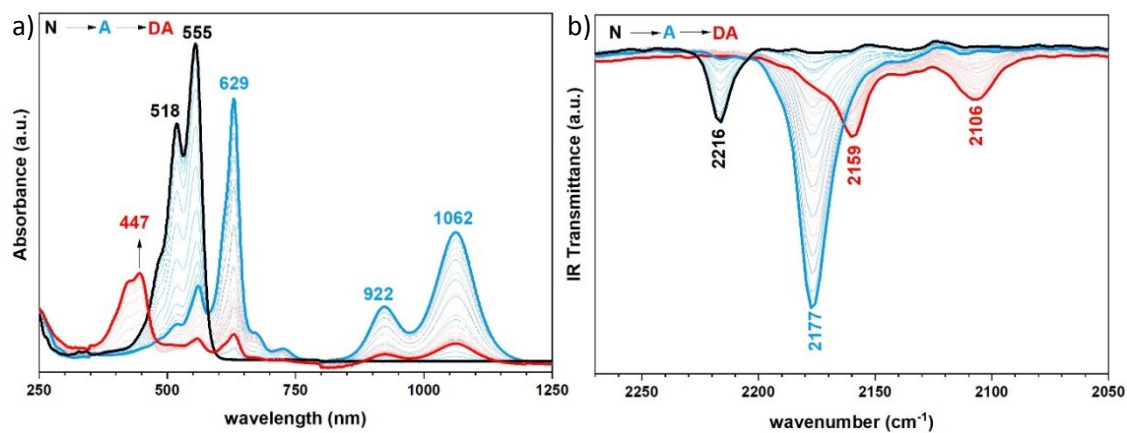

**Figure S5.** a) UV-Vis-NIR spectroelectrochemical reduction processes of **2TQ** in 0.1 M  $\text{Bu}_4\text{NPF}_6$  in dichloromethane at room temperature. b) IR spectroelectrochemical reduction processes of **2TQ** in the same conditions. Black lines correspond to the spectra of neutral species, blue lines correspond to the anionic species and red line correspond of dianionic species. Dashed light colour lines correspond to the intermediate spectra between the former species.

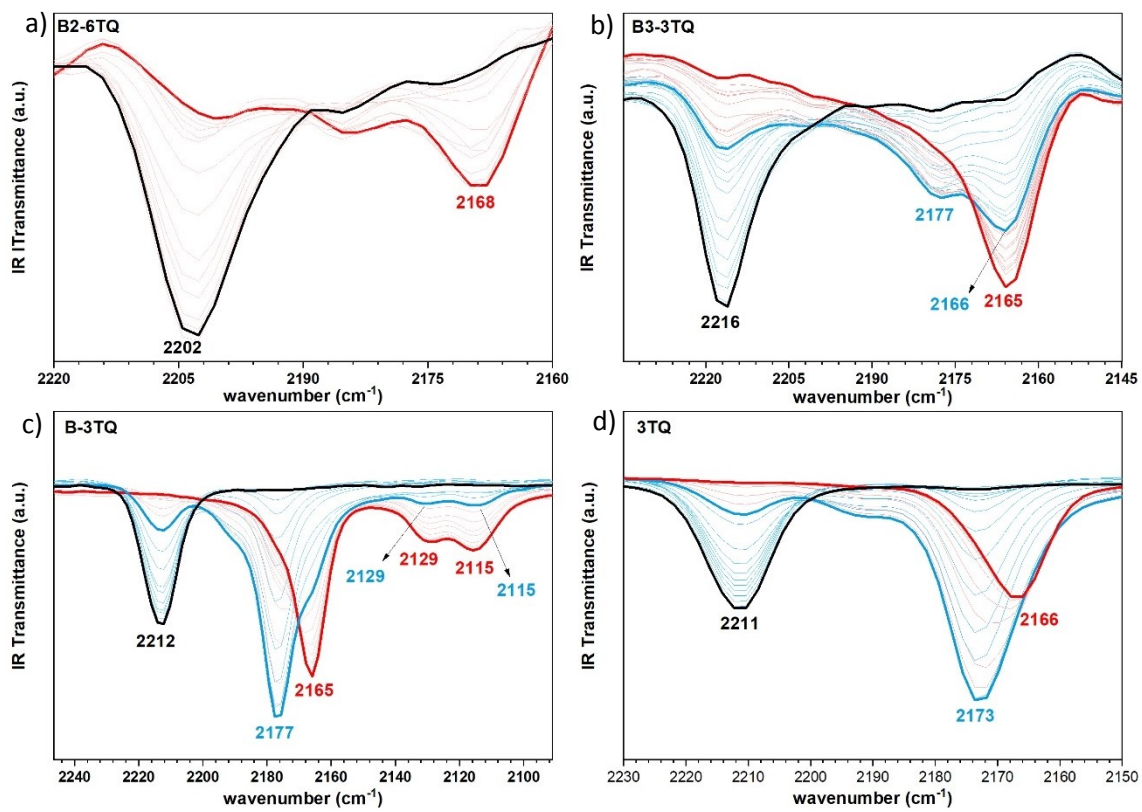

and **3TQ d**) in 0.1 M Bu<sub>4</sub>NPF<sub>6</sub> in dichloromethane at room temperature. Black lines correspond to the spectra of neutral species, blue lines correspond to the anionic species and red line correspond to the dianionic species. Dashed light colour lines correspond to the intermediate spectra between the former species.

#### Part 4. Deconvolution Fitting Parameters.

**Table S1.** Fitting parameters of **B2-6TQ** UV-Vis-NIR electronic absorption spectrum deconvolution.

| Model           | Gauss                                                  |                            |                             |                             |
|-----------------|--------------------------------------------------------|----------------------------|-----------------------------|-----------------------------|
| Equation        | $y=y_0 + (A/(w*\sqrt{\pi/2})) * \exp(-2*((x-xc)/w)^2)$ |                            |                             |                             |
| Plot            | Peak1(B)                                               | Peak2(B)                   | Peak3(B)                    | Peak4(B)                    |
| y0*             | 0,0116 ± 0                                             | 0,0116 ± 0                 | 0,0116 ± 0                  | 0,0116 ± 0                  |
| xc              | <b>890,94491</b> ± 5,75732                             | <b>975,54256</b> ± 0,19466 | <b>1037,00309</b> ± 5,38497 | <b>1234,93076</b> ± 2,81074 |
| w               | 145,07895 ± 6,32475                                    | 63,96035 ± 0,62563         | 149,79141 ± 5,12109         | 64,0343 ± 5,53716           |
| A               | 3,34944 ± 0,32406                                      | 3,19777 ± 0,09841          | 4,65861 ± 0,35567           | 0,11892 ± 0,01323           |
| y0              | 0,0116 ± 0                                             | 0,0116 ± 0                 | 0,0116 ± 0                  | 0,0116 ± 0                  |
| Reduced Chi-Sqr | 2,19778E-7                                             |                            |                             |                             |
| R-Square (COD)  | <b>0,99945</b>                                         |                            |                             |                             |
| Adj. R-Square   | 0,99943                                                |                            |                             |                             |

#### Part 5. Optimized Coordinates.

All Cartesian coordinates corresponding to the optimized energy structures are shown below:

##### Neutrals

##### 1TQ:

|   |             |             |             |
|---|-------------|-------------|-------------|
| C | -1.25706900 | -0.27795500 | -0.00000900 |
| S | 0.00001800  | 0.96360500  | 0.00025000  |
| C | 1.25706300  | -0.27793100 | 0.00005900  |
| C | 0.67742600  | -1.60235900 | -0.00009800 |
| C | -0.67737300 | -1.60237800 | -0.00017000 |
| C | 2.60090400  | 0.01674300  | -0.00005300 |
| C | -2.60085300 | 0.01670100  | -0.00000400 |
| C | -3.07231900 | 1.36318100  | 0.00004400  |
| N | -3.43399000 | 2.46981500  | 0.00023000  |
| C | -3.57004400 | -1.03242500 | -0.00013300 |
| N | -4.34432300 | -1.90161500 | -0.00019000 |
| C | 3.07221600  | 1.36318200  | -0.00021200 |
| N | 3.43403800  | 2.46977500  | -0.00049300 |
| C | 3.56987900  | -1.03253000 | 0.00016600  |
| N | 4.34436800  | -1.90154000 | 0.00032100  |
| H | 1.30019300  | -2.48902600 | -0.00026300 |
| H | -1.30010100 | -2.48907000 | -0.00034600 |

##### 2TQ:

|   |             |             |             |
|---|-------------|-------------|-------------|
| C | 3.19501000  | 0.23811700  | 0.00010800  |
| S | 1.97234100  | -1.02952300 | -0.00000200 |
| C | 0.66440600  | 0.17597300  | 0.00009600  |
| C | 1.21989500  | 1.50031800  | 0.00016200  |
| C | 2.57979500  | 1.53903500  | 0.00010200  |
| C | -0.66435600 | -0.17601100 | 0.00003400  |
| C | -1.21991100 | -1.50032300 | -0.00013800 |
| C | -2.57981500 | -1.53899400 | -0.00014600 |
| C | -3.19499700 | -0.23807100 | -0.00000700 |
| S | -1.97228900 | 1.02952700  | 0.00022500  |
| C | -4.55143800 | 0.02804000  | -0.00004100 |
| C | 4.55133400  | -0.02796600 | 0.00003200  |
| C | 5.49292700  | 1.04267500  | -0.00039900 |
| N | 6.24273200  | 1.93402200  | -0.00045400 |
| C | -5.04486100 | 1.36407400  | -0.00000300 |
| N | -5.41507400 | 2.46875900  | 0.00000800  |
| C | 5.04478600  | -1.36406900 | 0.00021400  |
| N | 5.41492100  | -2.46876100 | 0.00025000  |
| C | -5.49283800 | -1.04271500 | -0.00013700 |
| N | -6.24262900 | -1.93409700 | -0.00018400 |
| H | 0.59163000  | 2.38405200  | 0.00038500  |
| H | 3.17615000  | 2.44333200  | 0.00000900  |
| H | -0.59170700 | -2.38411300 | -0.00027200 |
| H | -3.17617600 | -2.44329200 | -0.00029300 |

### 3TQ:

|   |             |             |             |
|---|-------------|-------------|-------------|
| S | -4.01429000 | 0.82462600  | -0.00036200 |
| C | -5.12788800 | -0.53757300 | -0.00020300 |
| C | -4.40858500 | -1.77619700 | 0.00058400  |
| C | -3.05432100 | -1.61862000 | 0.00102400  |
| C | -2.59876600 | -0.25901400 | 0.00067700  |
| C | -1.27402400 | 0.14706300  | 0.00076400  |
| C | -6.50549300 | -0.37631100 | -0.00078200 |
| S | 0.00000200  | -1.07979800 | -0.00006800 |
| C | 1.27402100  | 0.14706700  | 0.00046200  |
| C | 0.69263400  | 1.46760300  | 0.00093300  |
| C | -0.69263600 | 1.46759400  | 0.00128500  |
| C | 2.59876400  | -0.25900700 | 0.00043000  |
| C | 3.05432100  | -1.61861200 | 0.00094700  |
| C | 4.40858300  | -1.77619400 | 0.00062400  |
| C | 5.12789200  | -0.53757200 | -0.00020200 |
| S | 4.01429800  | 0.82463100  | -0.00049100 |
| C | 6.50549300  | -0.37631400 | -0.00069200 |
| C | -1.55206100 | 2.70092200  | 0.00237100  |
| C | 1.55200700  | 2.70097000  | 0.00109600  |
| C | -7.09947600 | 0.91662900  | -0.00146300 |
| N | -7.55199200 | 1.99089900  | -0.00200000 |
| C | 7.35792100  | -1.51736400 | -0.00032600 |
| N | 8.03230400  | -2.46780200 | 0.00002100  |
| C | 7.09949100  | 0.91662500  | -0.00155000 |
| N | 7.55201900  | 1.99089000  | -0.00225600 |
| C | -7.35791100 | -1.51736600 | -0.00071300 |
| N | -8.03228400 | -2.46781100 | -0.00054700 |
| H | -4.92236700 | -2.72962600 | 0.00086600  |
| H | -2.36150300 | -2.45251400 | 0.00174100  |



|   |             |             |             |
|---|-------------|-------------|-------------|
| H | 2.36150000  | -2.45250400 | 0.00168700  |
| H | 4.92236100  | -2.72962500 | 0.00099600  |
| H | -0.95726700 | 3.61322500  | 0.00479700  |
| H | -2.19806600 | 2.73583400  | -0.88137900 |
| H | -2.20020300 | 2.73268600  | 0.88464000  |
| H | 2.19909600  | 2.73441300  | -0.88189500 |
| H | 0.95713600  | 3.61322900  | 0.00102200  |
| H | 2.19904300  | 2.73433300  | 0.88413200  |

4TQ:

|   |              |             |             |
|---|--------------|-------------|-------------|
| C | 7.09848900   | -0.24952800 | -0.00010700 |
| C | 6.50756100   | -1.55386500 | -0.00058400 |
| C | 5.14019000   | -1.53611800 | -0.00056700 |
| C | 4.56539500   | -0.23161900 | -0.00007700 |
| S | 5.85207000   | 0.99402000  | 0.00035100  |
| C | 3.22317700   | 0.11103200  | 0.00004500  |
| S | 1.93047600   | -1.10103400 | -0.00024800 |
| C | 0.67699900   | 0.15237600  | 0.00009300  |
| C | 1.28528400   | 1.43918100  | 0.00038900  |
| C | 2.65539100   | 1.41895200  | 0.00038900  |
| C | -0.67700000  | -0.15237900 | 0.00009100  |
| C | -1.28528500  | -1.43918300 | 0.00031700  |
| C | -2.65539300  | -1.41895300 | 0.00033900  |
| C | -3.22317700  | -0.11103300 | 0.00007900  |
| S | -1.93047600  | 1.10103200  | -0.00015900 |
| C | -4.56539600  | 0.23162000  | -0.00001300 |
| S | -5.85207100  | -0.99401900 | 0.00045100  |
| C | -7.09848900  | 0.24953000  | -0.00007200 |
| C | -6.50756100  | 1.55386700  | -0.00052500 |
| C | -5.14019000  | 1.53611900  | -0.00049000 |
| C | -8.45501700  | -0.04823100 | -0.00006100 |
| C | 8.45501600   | 0.04823200  | -0.00004200 |
| C | -9.41558000  | 1.00268000  | -0.00053700 |
| N | -10.18044700 | 1.88221300  | -0.00083100 |
| C | -8.91805300  | -1.39285300 | 0.00036600  |
| N | -9.26303100  | -2.50654700 | 0.00082400  |
| C | 8.91805700   | 1.39285400  | 0.00036700  |
| N | 9.26303900   | 2.50654600  | 0.00081300  |
| C | 9.41558100   | -1.00267800 | -0.00042600 |
| N | 10.18044400  | -1.88221400 | -0.00064800 |
| H | 7.11697100   | -2.44919900 | -0.00096400 |
| H | 4.52919000   | -2.43211000 | -0.00090700 |
| H | 0.69878300   | 2.35093600  | 0.00065200  |
| H | 3.27091000   | 2.31112900  | 0.00064300  |
| H | -0.69878500  | -2.35093900 | 0.00051200  |
| H | -3.27091300  | -2.31113000 | 0.00054300  |
| H | -7.11697100  | 2.44920200  | -0.00091700 |
| H | -4.52919000  | 2.43211200  | -0.00082000 |

5TQ:

|   |             |             |             |
|---|-------------|-------------|-------------|
| C | -9.07411600 | -0.21870000 | -0.00002600 |
| S | -7.81156700 | 1.00808500  | -0.00002100 |
| C | -6.54899600 | -0.22675400 | -0.00000800 |
| C | -7.12170200 | -1.51169300 | -0.00002400 |
| C | -8.50593700 | -1.51623100 | -0.00003400 |

|   |              |             |             |
|---|--------------|-------------|-------------|
| C | -5.17756400  | 0.12496800  | 0.00000900  |
| C | -4.60644900  | 1.40177600  | 0.00002600  |
| C | -3.20944100  | 1.39794100  | 0.00003900  |
| C | -2.64525400  | 0.12189500  | 0.00002900  |
| S | -3.91002200  | -1.10123000 | 0.00001400  |
| C | -1.26536100  | -0.24170200 | 0.00003400  |
| S | 0.00000000   | 0.98136800  | 0.00002600  |
| C | 1.26536100   | -0.24170200 | 0.00003100  |
| C | 0.70046200   | -1.51471000 | 0.00004700  |
| C | -0.70046200  | -1.51471000 | 0.00005000  |
| C | 2.64525400   | 0.12189500  | 0.00002300  |
| C | 3.20944100   | 1.39794100  | 0.00001500  |
| C | 4.60644900   | 1.40177600  | 0.00000600  |
| C | 5.17756400   | 0.12496800  | 0.00000700  |
| S | 3.91002200   | -1.10123000 | 0.00002200  |
| C | 6.54899600   | -0.22675400 | -0.00000200 |
| S | 7.81156700   | 1.00808500  | -0.00002400 |
| C | 9.07411600   | -0.21870000 | -0.00001300 |
| C | 8.50593700   | -1.51623100 | -0.00000500 |
| C | 7.12170200   | -1.51169300 | 0.00000200  |
| C | 10.43747700  | 0.10875900  | -0.00001700 |
| C | -10.43747700 | 0.10875900  | -0.00002800 |
| C | 11.41442400  | -0.92329200 | -0.00001100 |
| N | 12.19483100  | -1.79006000 | -0.00000900 |
| C | -10.87704200 | 1.45825700  | -0.00002400 |
| N | -11.20773000 | 2.57717900  | -0.00001900 |
| C | 10.87704200  | 1.45825700  | -0.00003000 |
| N | 11.20772900  | 2.57717900  | -0.00003800 |
| C | -11.41442400 | -0.92329200 | -0.00003600 |
| N | -12.19483100 | -1.79006000 | -0.00004400 |
| H | -6.52173100  | -2.41479300 | -0.00002400 |
| H | -9.12042100  | -2.40819800 | -0.00004300 |
| H | -5.20158500  | 2.30775300  | 0.00002900  |
| H | -2.61125100  | 2.30190800  | 0.00005400  |
| H | 1.29632800   | -2.42023100 | 0.00005600  |
| H | -1.29632800  | -2.42023100 | 0.00006200  |
| H | 2.61125100   | 2.30190800  | 0.00001500  |
| H | 5.20158500   | 2.30775300  | -0.00000100 |
| H | 9.12042100   | -2.40819800 | 0.00000000  |
| H | 6.52173100   | -2.41479300 | 0.00001200  |

6TQ:

|   |             |             |             |
|---|-------------|-------------|-------------|
| S | 9.78122100  | -0.98378600 | 0.00269200  |
| C | 11.03378500 | 0.25328700  | 0.00119800  |
| C | 10.45522800 | 1.54470900  | -0.00112500 |
| C | 9.06955000  | 1.52834100  | -0.00165600 |
| C | 8.50875500  | 0.23986500  | 0.00020400  |
| C | 7.13836800  | -0.12570800 | 0.00024700  |
| C | 12.40083200 | -0.06410300 | 0.00226300  |
| S | 5.86096600  | 1.08982000  | -0.00234200 |
| C | 4.60671800  | -0.14231400 | -0.00074700 |
| C | 5.17906100  | -1.41200300 | 0.00160400  |
| C | 6.57867400  | -1.40493000 | 0.00215400  |
| C | 3.22076000  | 0.21404600  | -0.00183200 |
| C | 2.64673600  | 1.47877400  | -0.00412600 |
| C | 1.24150600  | 1.46587700  | -0.00476900 |
| C | 0.69113800  | 0.19133700  | -0.00298100 |

|   |              |             |             |
|---|--------------|-------------|-------------|
| S | 1.96581400   | -1.01904700 | -0.00009600 |
| C | -0.69113800  | -0.19133300 | -0.00318800 |
| S | -1.96581500  | 1.01904800  | 0.00032500  |
| C | -3.22076000  | -0.21404300 | -0.00238400 |
| C | -2.64673600  | -1.47877000 | -0.00542600 |
| C | -1.24150500  | -1.46587200 | -0.00587300 |
| C | -4.60671900  | 0.14231600  | -0.00126700 |
| C | -5.17906200  | 1.41200500  | 0.00063700  |
| C | -6.57867500  | 1.40493100  | 0.00129100  |
| C | -7.13836800  | 0.12570900  | -0.00009200 |
| S | -5.86096500  | -1.08981900 | -0.00216200 |
| C | -8.50875500  | -0.23986600 | 0.00003400  |
| S | -9.78122100  | 0.98378500  | 0.00250700  |
| C | -11.03378500 | -0.25328900 | 0.00125200  |
| C | -10.45522700 | -1.54471100 | -0.00098000 |
| C | -9.06954900  | -1.52834200 | -0.00163100 |
| C | -12.40083200 | 0.06410000  | 0.00239700  |
| C | -13.36964100 | -0.97521100 | 0.00132200  |
| N | -14.14348300 | -1.84799600 | 0.00040700  |
| C | 13.36964100  | 0.97520700  | 0.00097400  |
| N | 14.14348400  | 1.84799200  | -0.00010900 |
| C | 12.85115500  | -1.40974300 | 0.00462700  |
| N | 13.19140900  | -2.52592200 | 0.00658800  |
| C | -12.85115500 | 1.40974000  | 0.00462300  |
| N | -13.19141100 | 2.52591800  | 0.00645200  |
| H | 11.06188700  | 2.44202500  | -0.00233100 |
| H | 8.46183300   | 2.42622000  | -0.00334500 |
| H | 4.58786900   | -2.32051500 | 0.00290100  |
| H | 7.18071100   | -2.30637500 | 0.00391900  |
| H | 3.23390600   | 2.39001200  | -0.00549800 |
| H | 0.63781400   | 2.36619000  | -0.00690000 |
| H | -3.23390600  | -2.39000600 | -0.00755500 |
| H | -0.63781400  | -2.36618400 | -0.00853500 |
| H | -4.58787100  | 2.32051800  | 0.00140900  |
| H | -7.18071300  | 2.30637600  | 0.00265700  |
| H | -11.06188600 | -2.44202800 | -0.00204800 |
| H | -8.46183100  | -2.42622100 | -0.00330200 |

7TQ:

|   |              |             |             |
|---|--------------|-------------|-------------|
| S | -11.73384000 | 1.02029500  | 0.00040900  |
| C | -12.99659300 | -0.20642800 | 0.00007200  |
| C | -12.42864800 | -1.50202200 | -0.00030000 |
| C | -11.04236000 | -1.49686000 | -0.00032600 |
| C | -10.47132300 | -0.21346500 | 0.00001000  |
| C | -9.09740400  | 0.14162800  | 0.00006100  |
| C | -14.36140800 | 0.12249400  | 0.00017500  |
| S | -7.83011000  | -1.08451500 | -0.00024700 |
| C | -6.56564600  | 0.13656800  | -0.00001700 |
| C | -7.12666400  | 1.41045800  | 0.00029300  |
| C | -8.52718300  | 1.41528000  | 0.00034300  |
| C | -5.18173000  | -0.23289300 | -0.00014900 |
| C | -4.61865200  | -1.50099700 | -0.00039900 |
| C | -3.21177200  | -1.49945700 | -0.00044300 |
| C | -2.65205700  | -0.23055500 | -0.00022600 |
| S | -3.91636200  | 0.98958200  | -0.00002800 |
| C | -1.26468900  | 0.14321100  | -0.00018400 |
| S | 0.00000000   | -1.07765600 | 0.00004200  |

|   |              |             |             |
|---|--------------|-------------|-------------|
| C | 1.26468900   | 0.14321100  | -0.00007800 |
| C | 0.70425000   | 1.41039100  | -0.00024100 |
| C | -0.70425000  | 1.41039100  | -0.00030000 |
| C | 2.65205600   | -0.23055600 | 0.00000000  |
| C | 3.21177100   | -1.49945800 | 0.00024900  |
| C | 4.61865100   | -1.50099700 | 0.00026900  |
| C | 5.18173000   | -0.23289400 | 0.00003100  |
| S | 3.91636100   | 0.98958100  | -0.00025700 |
| C | 6.56564500   | 0.13656700  | -0.00001200 |
| S | 7.83011000   | -1.08451600 | 0.00026100  |
| C | 9.09740400   | 0.14162800  | 0.00003700  |
| C | 8.52718300   | 1.41528000  | -0.00023300 |
| C | 7.12666400   | 1.41045700  | -0.00026000 |
| C | 10.47132300  | -0.21346500 | 0.00013500  |
| C | 11.04236100  | -1.49686100 | 0.00044200  |
| C | 12.42864800  | -1.50202200 | 0.00045400  |
| C | 12.99659300  | -0.20642800 | 0.00016000  |
| S | 11.73384000  | 1.02029500  | -0.00014000 |
| C | 14.36140700  | 0.12249400  | 0.00008700  |
| C | 15.33873100  | -0.90866700 | 0.00026800  |
| N | 16.11982900  | -1.77504400 | 0.00039400  |
| C | 14.80084600  | 1.47160900  | -0.00027700 |
| N | 15.13253700  | 2.59042400  | -0.00060200 |
| C | -14.80084700 | 1.47160800  | 0.00049000  |
| N | -15.13253500 | 2.59042500  | 0.00074200  |
| C | -15.33873200 | -0.90866700 | -0.00016800 |
| N | -16.11982600 | -1.77504700 | -0.00049400 |
| H | -13.04254800 | -2.39440300 | -0.00054400 |
| H | -10.44178100 | -2.39952500 | -0.00059800 |
| H | -6.52756700  | 2.31375300  | 0.00047900  |
| H | -9.12156700  | 2.32182000  | 0.00056400  |
| H | -5.21312700  | -2.40754600 | -0.00053200 |
| H | -2.61521300  | -2.40448200 | -0.00063000 |
| H | 1.29939000   | 2.31645000  | -0.00033100 |
| H | -1.29938900  | 2.31645000  | -0.00046000 |
| H | 2.61521200   | -2.40448200 | 0.00042900  |
| H | 5.21312600   | -2.40754600 | 0.00046100  |
| H | 9.12156700   | 2.32181900  | -0.00040400 |
| H | 6.52756700   | 2.31375200  | -0.00045600 |
| H | 10.44178200  | -2.39952600 | 0.00065000  |
| H | 13.04254800  | -2.39440300 | 0.00066700  |

**B3-6TQ:**

|   |              |             |             |
|---|--------------|-------------|-------------|
| S | -9.96159500  | 0.09778200  | -0.00029300 |
| C | -10.90293300 | -1.38903600 | -0.00009300 |
| C | -10.03786300 | -2.52511600 | 0.00015100  |
| C | -8.70896800  | -2.20053700 | 0.00017300  |
| C | -8.42517400  | -0.80089600 | -0.00004500 |
| C | -7.16520600  | -0.21864000 | -0.00008200 |
| C | -12.29429200 | -1.39203400 | -0.00017300 |
| S | -5.73804200  | -1.26067500 | 0.00008900  |
| C | -4.60215200  | 0.09589500  | -0.00003400 |
| C | -5.33306300  | 1.33498400  | -0.00019700 |
| C | -6.74963400  | 1.16460000  | -0.00023100 |
| C | -3.23482500  | -0.17763900 | -0.00001700 |

|   |              |             |             |
|---|--------------|-------------|-------------|
| C | -2.63308300  | -1.46633400 | 0.00006300  |
| C | -1.25658000  | -1.46255000 | 0.00009200  |
| C | -0.67696200  | -0.17313700 | 0.00001800  |
| S | -1.95564200  | 1.05162200  | -0.00007000 |
| C | 0.67696200   | 0.17313500  | 0.00003800  |
| S | 1.95564200   | -1.05162300 | 0.00007600  |
| C | 3.23482500   | 0.17763800  | 0.00011700  |
| C | 2.63308300   | 1.46633200  | 0.00009800  |
| C | 1.25658000   | 1.46254800  | 0.00006600  |
| C | 4.60215200   | -0.09589600 | 0.00017500  |
| C | 5.33306300   | -1.33498500 | 0.00010900  |
| C | 6.74963500   | -1.16460200 | 0.00012900  |
| C | 7.16520600   | 0.21863900  | 0.00022600  |
| S | 5.73804200   | 1.26067300  | 0.00028000  |
| C | 8.42517400   | 0.80089600  | 0.00028900  |
| S | 9.96159600   | -0.09778100 | 0.00016200  |
| C | 10.90293200  | 1.38903800  | 0.00032500  |
| C | 10.03786100  | 2.52511700  | 0.00046600  |
| C | 8.70896700   | 2.20053700  | 0.00044400  |
| C | 12.29429200  | 1.39203800  | 0.00031100  |
| C | -4.80637400  | 2.64226000  | -0.00030600 |
| C | -5.63159600  | 3.75891000  | -0.00046000 |
| C | -7.04495300  | 3.58823600  | -0.00050100 |
| C | -7.57545600  | 2.30475400  | -0.00038300 |
| C | 4.80637500   | -2.64226200 | 0.00004300  |
| C | 5.63159700   | -3.75891100 | -0.00001800 |
| C | 7.04495400   | -3.58823700 | -0.00000500 |
| C | 7.57545700   | -2.30475600 | 0.00007100  |
| C | -5.02898500  | 5.14117600  | -0.00058500 |
| C | -7.96343200  | 4.78414400  | -0.00067000 |
| C | 5.02898600   | -5.14117700 | -0.00009900 |
| C | 7.96343300   | -4.78414600 | -0.00007400 |
| C | 13.00317500  | 2.62603000  | 0.00044500  |
| N | 13.55832400  | 3.65132400  | 0.00054000  |
| C | -13.00317700 | -2.62602600 | -0.00000500 |
| N | -13.55832700 | -3.65132000 | 0.00012400  |
| C | 13.03619700  | 0.17943700  | 0.00018100  |
| N | 13.61213300  | -0.83473900 | 0.00008600  |
| C | -13.03619700 | -0.17943200 | -0.00040200 |
| N | -13.61213200 | 0.83474400  | -0.00058000 |
| H | -10.42900000 | -3.53495700 | 0.00030600  |
| H | -7.91913900  | -2.94344800 | 0.00035500  |
| H | -3.22338600  | -2.37518000 | 0.00009600  |
| H | -0.65643500  | -2.36527200 | 0.00014800  |
| H | 3.22338600   | 2.37517800  | 0.00010500  |
| H | 0.65643500   | 2.36527000  | 0.00004400  |
| H | 10.42899700  | 3.53495800  | 0.00058400  |
| H | 7.91913700   | 2.94344800  | 0.00054800  |
| H | -3.73532300  | 2.80059400  | -0.00026200 |
| H | -8.65314900  | 2.20211500  | -0.00039900 |
| H | 3.73532300   | -2.80059600 | 0.00004700  |
| H | 8.65315000   | -2.20211600 | 0.00009600  |
| H | -5.34305700  | 5.71561000  | 0.87868400  |
| H | -3.93748000  | 5.09739400  | -0.00046600 |
| H | -5.34287300  | 5.71536200  | -0.88008400 |
| H | -7.79873800  | 5.41720200  | -0.88048100 |
| H | -9.01173300  | 4.47774900  | -0.00063700 |
| H | -7.79875300  | 5.41744800  | 0.87896500  |

|   |            |             |             |
|---|------------|-------------|-------------|
| H | 5.34302200 | -5.71556900 | 0.87921100  |
| H | 3.93748100 | -5.09739600 | -0.00002700 |
| H | 5.34291000 | -5.71540600 | -0.87955700 |
| H | 7.79877700 | -5.41724800 | -0.87985900 |
| H | 9.01173400 | -4.47775000 | -0.00001200 |
| H | 7.79871700 | -5.41740400 | 0.87958700  |

**B2-2TQ:**

|   |             |             |             |
|---|-------------|-------------|-------------|
| C | 3.21946600  | 0.33305300  | 0.07130900  |
| S | 1.77270500  | 1.32149800  | -0.02765100 |
| C | 0.68219300  | -0.08024000 | -0.18634300 |
| C | 1.48805600  | -1.30387500 | -0.22537000 |
| C | 2.88324300  | -1.07593300 | -0.05725900 |
| C | -0.68214700 | 0.08048700  | -0.18621900 |
| C | -1.48811900 | 1.30405500  | -0.22516200 |
| C | -2.88330500 | 1.07595300  | -0.05722900 |
| C | -3.21938500 | -0.33305700 | 0.07136800  |
| S | -1.77251300 | -1.32134600 | -0.02728100 |
| C | -4.44214800 | -0.95401000 | 0.24139300  |
| C | 4.44228600  | 0.95391400  | 0.24135000  |
| C | -1.04252000 | 2.61905900  | -0.43904500 |
| C | -1.95003100 | 3.67380800  | -0.43641200 |
| C | -3.31429100 | 3.44531800  | -0.23227500 |
| C | -3.78645000 | 2.15098100  | -0.05200800 |
| C | 1.04233100  | -2.61878300 | -0.43957400 |
| C | 1.94970800  | -3.67364600 | -0.43688600 |
| C | 3.31394900  | -3.44534800 | -0.23241000 |
| C | 3.78624700  | -2.15108600 | -0.05196000 |
| C | -5.68079700 | -0.25738200 | 0.34601300  |
| N | -6.70560100 | 0.29001400  | 0.43370500  |
| C | -4.51411100 | -2.37811600 | 0.32229000  |
| N | -4.54325000 | -3.54116200 | 0.38200400  |
| C | 4.51439500  | 2.37801100  | 0.32197100  |
| N | 4.54365800  | 3.54105900  | 0.38160000  |
| C | 5.68081600  | 0.25711300  | 0.34638500  |
| N | 6.70545500  | -0.29054400 | 0.43437200  |
| H | -0.00242000 | 2.83819500  | -0.63393700 |
| H | -1.58745400 | 4.68321700  | -0.60206700 |
| H | -4.01212000 | 4.27600700  | -0.22902700 |
| H | -4.84592700 | 1.98033600  | 0.08252900  |
| H | 0.00225100  | -2.83769700 | -0.63483300 |
| H | 1.58705500  | -4.68298800 | -0.60278500 |
| H | 4.01166500  | -4.27613100 | -0.22907300 |
| H | 4.84572200  | -1.98060000 | 0.08277400  |

**B3-3TQ:**

|   |            |             |             |
|---|------------|-------------|-------------|
| S | 3.94899800 | 0.93382000  | -0.00015200 |
| C | 5.22077100 | -0.26853800 | -0.00042800 |
| C | 4.65184700 | -1.60463800 | -0.00043000 |
| C | 3.22586400 | -1.60861400 | -0.00033100 |
| C | 2.63109400 | -0.26958800 | -0.00013700 |
| C | 1.31161400 | 0.12696500  | 0.00018100  |
| C | 6.54047000 | 0.15081500  | -0.00060700 |

|   |             |             |             |
|---|-------------|-------------|-------------|
| S | 0.00013900  | -1.06787000 | 0.00071200  |
| C | -1.31149400 | 0.12679100  | 0.00091900  |
| C | -0.71286100 | 1.46337700  | 0.00086100  |
| C | 0.71280300  | 1.46348600  | 0.00034600  |
| C | -2.63096000 | -0.26981200 | 0.00089500  |
| C | -3.22580700 | -1.60881800 | 0.00124300  |
| C | -4.65179200 | -1.60474300 | 0.00039900  |
| C | -5.22063100 | -0.26860900 | -0.00049300 |
| S | -3.94879100 | 0.93367100  | 0.00008000  |
| C | -6.54030600 | 0.15081700  | -0.00159600 |
| C | -1.37825800 | 2.69401100  | 0.00138300  |
| C | -0.70534500 | 3.92132700  | 0.00120500  |
| C | 0.70486200  | 3.92144300  | 0.00046200  |
| C | 1.37798500  | 2.69424000  | 0.00009200  |
| C | -1.55687000 | 5.17191700  | 0.00183500  |
| C | 1.55617800  | 5.17217500  | 0.00009900  |
| C | 5.37434000  | -2.80940900 | -0.00060900 |
| C | 4.69542300  | -4.02016000 | -0.00072500 |
| C | 3.29713200  | -4.03593100 | -0.00071100 |
| C | 2.56785700  | -2.85193200 | -0.00053000 |
| C | -2.56790800 | -2.85219600 | 0.00234000  |
| C | -3.29727700 | -4.03613700 | 0.00244500  |
| C | -4.69556500 | -4.02026000 | 0.00148000  |
| C | -5.37438200 | -2.80945600 | 0.00048100  |
| C | -6.84271200 | 1.54587000  | -0.00223500 |
| N | -7.05877800 | 2.69096000  | -0.00276600 |
| C | 7.65796900  | -0.73193700 | -0.00083100 |
| N | 8.58825000  | -1.43413300 | -0.00100100 |
| C | -7.65785000 | -0.73187800 | -0.00214900 |
| N | -8.58816200 | -1.43403200 | -0.00260000 |
| C | 6.84295000  | 1.54585200  | -0.00056100 |
| N | 7.05907400  | 2.69093000  | -0.00054700 |
| H | -2.45768000 | 2.73798100  | 0.00207100  |
| H | 2.45739300  | 2.73841100  | -0.00039400 |
| H | -0.97448700 | 6.09204200  | 0.00229300  |
| H | -2.20847000 | 5.19386200  | -0.87838200 |
| H | -2.20843000 | 5.19297400  | 0.88209800  |
| H | 0.97364000  | 6.09220300  | -0.00008300 |
| H | 2.20783300  | 5.19400200  | 0.88027800  |
| H | 2.20767600  | 5.19356900  | -0.88020200 |
| H | 6.45583300  | -2.80080200 | -0.00069100 |
| H | 5.25352900  | -4.95050900 | -0.00087700 |
| H | 2.76644300  | -4.98297100 | -0.00088000 |
| H | 1.49067400  | -2.91722100 | -0.00064000 |
| H | -1.49073600 | -2.91758800 | 0.00320100  |
| H | -2.76666300 | -4.98321900 | 0.00329400  |
| H | -5.25374400 | -4.95056500 | 0.00154700  |
| H | -6.45587400 | -2.80076100 | -0.00021200 |

**B4-4TQ:**

|   |            |             |             |
|---|------------|-------------|-------------|
| C | 7.15819100 | 0.20383900  | 0.03869800  |
| C | 6.66530000 | -1.13911300 | -0.21428100 |
| C | 5.24827100 | -1.19591300 | -0.35462100 |
| C | 4.58375300 | 0.08985700  | -0.16577400 |
| S | 5.82848000 | 1.34443500  | 0.08669600  |
| C | 3.24126800 | 0.38841200  | -0.08566300 |

|   |              |             |             |
|---|--------------|-------------|-------------|
| S | 2.01886200   | -0.89508300 | 0.01990600  |
| C | 0.65091200   | 0.22505900  | 0.21498200  |
| C | 1.16803100   | 1.58793600  | 0.25077800  |
| C | 2.57147200   | 1.68299400  | 0.02208700  |
| C | -0.65089500  | -0.22512400 | 0.21502700  |
| C | -1.16803100  | -1.58799500 | 0.25089600  |
| C | -2.57149600  | -1.68304900 | 0.02232600  |
| C | -3.24127800  | -0.38845400 | -0.08546600 |
| S | -2.01884100  | 0.89501800  | 0.02002100  |
| C | -4.58374800  | -0.08984300 | -0.16566600 |
| S | -5.82852200  | -1.34442100 | 0.08653600  |
| C | -7.15821100  | -0.20380400 | 0.03860100  |
| C | -6.66528300  | 1.13915500  | -0.21426900 |
| C | -5.24823800  | 1.19595400  | -0.35449100 |
| C | -8.44986700  | -0.66849500 | 0.22509500  |
| C | 8.44983900   | 0.66852800  | 0.22525500  |
| C | -7.44254300  | 2.30233100  | -0.34564300 |
| C | -6.82634500  | 3.51208900  | -0.63728800 |
| C | -5.44003900  | 3.56774700  | -0.82052100 |
| C | -4.65560700  | 2.42767000  | -0.68718300 |
| C | -0.43377000  | -2.76127100 | 0.50104100  |
| C | -1.05006100  | -4.00473300 | 0.43433800  |
| C | -2.40601000  | -4.10282600 | 0.10961100  |
| C | -3.16230700  | -2.95425100 | -0.08920900 |
| C | 0.43379500   | 2.76122800  | 0.50093700  |
| C | 1.05008300   | 4.00468400  | 0.43409800  |
| C | 2.40599400   | 4.10276900  | 0.10919700  |
| C | 3.16227100   | 2.95418500  | -0.08963200 |
| C | 7.44257100   | -2.30227800 | -0.34569100 |
| C | 6.82639200   | -3.51201000 | -0.63748900 |
| C | 5.44010000   | -3.56765600 | -0.82085400 |
| C | 4.65566000   | -2.42758900 | -0.68749000 |
| C | -9.60374300  | 0.16584700  | 0.21641000  |
| N | -10.56204400 | 0.82944800  | 0.21343700  |
| C | -8.68264900  | -2.05959800 | 0.44299800  |
| N | -8.84429400  | -3.20067000 | 0.61587800  |
| C | 9.60371400   | -0.16581400 | 0.21653700  |
| N | 10.56200300  | -0.82943200 | 0.21356100  |
| C | 8.68261300   | 2.05961500  | 0.44326100  |
| N | 8.84426200   | 3.20068000  | 0.61618500  |
| H | -8.51732100  | 2.26145600  | -0.23131900 |
| H | -7.42721000  | 4.40955200  | -0.74066200 |
| H | -4.96609800  | 4.50932600  | -1.08014100 |
| H | -3.59440000  | 2.50212100  | -0.87848800 |
| H | 0.61038200   | -2.71196700 | 0.77728800  |
| H | -0.47002300  | -4.90072600 | 0.63103000  |
| H | -2.87983300  | -5.07529400 | 0.02496300  |
| H | -4.20632900  | -3.06469400 | -0.34622400 |
| H | -0.61033300  | 2.71194300  | 0.77728400  |
| H | 0.47006800   | 4.90068700  | 0.63081400  |
| H | 2.87979000   | 5.07523900  | 0.02441200  |
| H | 4.20625600   | 3.06457800  | -0.34683300 |
| H | 8.51734200   | -2.26141400 | -0.23129200 |
| H | 7.42726700   | -4.40946300 | -0.74089800 |
| H | 4.96619100   | -4.50921100 | -1.08061600 |
| H | 3.59447000   | -2.50199500 | -0.87892600 |



B5-5TQ:

|   |              |             |             |
|---|--------------|-------------|-------------|
| C | -8.96674500  | 0.45444800  | -0.15222100 |
| S | -7.63795200  | 1.59552200  | -0.23289100 |
| C | -6.39326200  | 0.35179400  | 0.07545300  |
| C | -7.05998800  | -0.92510600 | 0.30222500  |
| C | -8.47215900  | -0.87438300 | 0.15154900  |
| C | -5.05012500  | 0.64947400  | -0.00136900 |
| C | -4.37941900  | 1.93986100  | -0.14325300 |
| C | -2.97274500  | 1.83840700  | -0.35114900 |
| C | -2.45550400  | 0.47880900  | -0.26805100 |
| S | -3.82610200  | -0.63576100 | -0.05174600 |
| C | -1.15252500  | 0.03024300  | -0.24141700 |
| S | 0.21359200   | 1.15613700  | -0.06706700 |
| C | 1.43869200   | -0.12678500 | 0.06679000  |
| C | 0.76711800   | -1.41986100 | 0.00653200  |
| C | -0.63582800  | -1.33336600 | -0.23150000 |
| C | 2.78405700   | 0.16856100  | 0.11290000  |
| C | 3.45605300   | 1.45366800  | 0.24501100  |
| C | 4.86309400   | 1.39772200  | 0.05316500  |
| C | 5.38333500   | 0.04640100  | -0.13005900 |
| S | 4.01914500   | -1.08967300 | -0.13506600 |
| C | 6.68517800   | -0.40100500 | -0.20711700 |
| S | 8.05763900   | 0.68044300  | 0.16013200  |
| C | 9.25033700   | -0.59728200 | 0.04834600  |
| C | 8.61512800   | -1.85265600 | -0.31044600 |
| C | 7.20387800   | -1.73643200 | -0.47660300 |
| C | 10.58294600  | -0.29785500 | 0.28901300  |
| C | -6.47857700  | -2.14739100 | 0.67995500  |
| C | -7.24427300  | -3.29889000 | 0.85593700  |
| C | -8.64749900  | -3.25000100 | 0.65870600  |
| C | -9.24025100  | -2.03767800 | 0.32063000  |
| C | 2.86612300   | 2.69192500  | 0.55193400  |
| C | 3.60639400   | 3.87097800  | 0.58754200  |
| C | 4.99094800   | 3.82881300  | 0.29445500  |
| C | 5.59214300   | 2.59892100  | 0.04015200  |
| C | -4.97218900  | 3.21359500  | -0.07898400 |
| C | -4.21425200  | 4.35624900  | -0.30299200 |
| C | -2.85370700  | 4.24915100  | -0.60582900 |
| C | -2.23581700  | 3.00505300  | -0.62629600 |
| C | 1.35550600   | -2.68681200 | 0.17312600  |
| C | 0.60031800   | -3.84178400 | 0.01052300  |
| C | -0.75263700  | -3.75607400 | -0.33085400 |
| C | -1.36776900  | -2.51547600 | -0.44596000 |
| C | 9.25869400   | -3.08563600 | -0.51414500 |
| C | 8.51710300   | -4.19310600 | -0.90201300 |
| C | 7.13740800   | -4.07643700 | -1.10963200 |
| C | 6.48387600   | -2.86694700 | -0.90628000 |
| C | -9.49840500  | -4.48330200 | 0.83138200  |
| C | -6.57377900  | -4.58643500 | 1.26439000  |
| C | 2.92985100   | 5.17531600  | 0.92715100  |
| C | 5.81686400   | 5.09053700  | 0.27243700  |
| C | -10.25917200 | 0.91024700  | -0.36425600 |
| C | 10.96522600  | 1.03805500  | 0.61279100  |
| N | 11.24916300  | 2.13841800  | 0.87191600  |
| C | 11.63503000  | -1.25528600 | 0.23622900  |
| N | 12.51252100  | -2.02199900 | 0.19890300  |
| C | -11.41031900 | 0.07318600  | -0.33297700 |

|   |              |             |             |
|---|--------------|-------------|-------------|
| N | -12.36644500 | -0.59365000 | -0.31222300 |
| C | -10.49469400 | 2.29138000  | -0.63378800 |
| N | -10.66089300 | 3.42476600  | -0.84905700 |
| H | -5.41728700  | -2.21257400 | 0.87808900  |
| H | -10.31466300 | -1.99965300 | 0.19669000  |
| H | 1.81444800   | 2.74823800  | 0.79927200  |
| H | 6.64928400   | 2.59818300  | -0.18826400 |
| H | -6.01977000  | 3.33013200  | 0.16054300  |
| H | -4.68970200  | 5.33046300  | -0.25465600 |
| H | -2.27142700  | 5.13938300  | -0.82175200 |
| H | -1.18791300  | 2.94757400  | -0.88626000 |
| H | 2.39520800   | -2.78076400 | 0.45451000  |
| H | 1.07050100   | -4.81136500 | 0.14060700  |
| H | -1.33174100  | -4.65859600 | -0.49880200 |
| H | -2.41047200  | -2.47573700 | -0.72937600 |
| H | 10.32826400  | -3.17579100 | -0.38042000 |
| H | 9.01473000   | -5.14405700 | -1.06110500 |
| H | 6.56631100   | -4.93724700 | -1.44379200 |
| H | 5.42561300   | -2.80531500 | -1.11776800 |
| H | -9.19401700  | -5.28095000 | 0.14344500  |
| H | -9.41500900  | -4.89181400 | 1.84545300  |
| H | -10.55160200 | -4.26327500 | 0.64440800  |
| H | -6.97841200  | -4.96636500 | 2.20966500  |
| H | -6.73117000  | -5.37291000 | 0.51688600  |
| H | -5.49701600  | -4.45157000 | 1.38978200  |
| H | 3.38606300   | 5.64706500  | 1.80519300  |
| H | 3.01208500   | 5.89591800  | 0.10484200  |
| H | 1.86838800   | 5.02775700  | 1.13940900  |
| H | 5.43458700   | 5.80839600  | -0.46276400 |
| H | 5.80220800   | 5.59661300  | 1.24491100  |
| H | 6.85897200   | 4.87797800  | 0.02390800  |

**B6-6TQ:**

|   |             |             |             |
|---|-------------|-------------|-------------|
| S | 9.21513800  | -0.91138000 | -1.26763800 |
| C | 10.27666700 | 0.29479500  | -1.96271600 |
| C | 9.85076100  | 1.62717800  | -1.57459100 |
| C | 8.69260000  | 1.62360200  | -0.74271800 |
| C | 8.15711700  | 0.29341500  | -0.48120900 |
| C | 7.00219500  | -0.09128100 | 0.16666800  |
| C | 11.34168400 | -0.11790100 | -2.75037900 |
| S | 5.77009300  | 1.09514300  | 0.63709800  |
| C | 4.57698800  | -0.13038200 | 1.13622100  |
| C | 5.20042900  | -1.44354000 | 1.04131300  |
| C | 6.52255600  | -1.42454000 | 0.52047400  |
| C | 3.28423700  | 0.22047800  | 1.45769100  |
| C | 2.69701300  | 1.53771500  | 1.68376300  |
| C | 1.27824700  | 1.52441900  | 1.82067300  |
| C | 0.68332300  | 0.19622500  | 1.71338500  |
| S | 1.99381200  | -0.99861800 | 1.55977400  |
| C | -0.64081000 | -0.17955400 | 1.65169100  |
| S | -1.93406200 | 1.02085800  | 1.41502400  |
| C | -3.20991700 | -0.19367900 | 1.17434900  |
| C | -2.64532000 | -1.51574600 | 1.42693400  |
| C | -1.24172900 | -1.50899000 | 1.67694100  |
| C | -4.47025200 | 0.16116900  | 0.74473900  |
| C | -5.07264300 | 1.47687300  | 0.58128600  |

|   |              |             |             |
|---|--------------|-------------|-------------|
| C | -6.33944300  | 1.46226000  | -0.06301800 |
| C | -6.84228100  | 0.12329500  | -0.35386100 |
| S | -5.61868600  | -1.06100400 | 0.14455100  |
| C | -8.06620300  | -0.27879600 | -0.84640300 |
| S | -9.42316200  | 0.87121900  | -1.00326700 |
| C | -10.57605600 | -0.36453700 | -1.46163100 |
| C | -9.92542600  | -1.65995200 | -1.53770900 |
| C | -8.53578200  | -1.60603100 | -1.22242700 |
| C | -11.89502600 | -0.00278900 | -1.69467600 |
| C | 4.65973600   | -2.66893700 | 1.46558400  |
| C | 5.37224100   | -3.86148500 | 1.37015900  |
| C | 6.68979200   | -3.84250800 | 0.85280400  |
| C | 7.24261000   | -2.62903200 | 0.45259600  |
| C | -4.54610300  | 2.70970500  | 1.00320400  |
| C | -5.19156500  | 3.91505800  | 0.74080100  |
| C | -6.40678500  | 3.90661400  | 0.01405400  |
| C | -6.95779300  | 2.68690400  | -0.36835700 |
| C | 3.39070700   | 2.75061900  | 1.84061200  |
| C | 2.70310500   | 3.92945300  | 2.10026600  |
| C | 1.31159500   | 3.91722600  | 2.23198300  |
| C | 0.60659900   | 2.72685300  | 2.10529500  |
| C | 10.47473300  | 2.83733400  | -1.92522700 |
| C | 9.97114900   | 4.03671000  | -1.44181800 |
| C | 8.85635200   | 4.03898400  | -0.59435100 |
| C | 8.22296100   | 2.85318500  | -0.24384800 |
| C | -3.35142000  | -2.72925400 | 1.50672500  |
| C | -2.68651200  | -3.91588700 | 1.79040000  |
| C | -1.30910400  | -3.91086900 | 2.02691600  |
| C | -0.59531100  | -2.71952400 | 1.98388900  |
| C | -10.52873900 | -2.87717500 | -1.89937000 |
| C | -9.76094600  | -4.03117400 | -1.97138900 |
| C | -8.38725200  | -3.97810100 | -1.70498500 |
| C | -7.77561700  | -2.78514200 | -1.33948800 |
| C | 7.50198600   | -5.10966500 | 0.75488800  |
| C | 4.74747700   | -5.15179700 | 1.83841900  |
| C | -4.58886100  | 5.21237700  | 1.21835800  |
| C | -7.10954300  | 5.19460000  | -0.33532600 |
| C | -12.29193000 | 1.36167500  | -1.56853200 |
| N | -12.58759400 | 2.48408200  | -1.46121800 |
| C | 12.26176100  | 0.77156600  | -3.37343800 |
| N | 13.02759500  | 1.48068100  | -3.89312100 |
| C | 11.56460600  | -1.50919100 | -2.97353300 |
| N | 11.72514000  | -2.65228300 | -3.13573600 |
| C | -12.91839600 | -0.92136100 | -2.06195200 |
| N | -13.77284000 | -1.65531500 | -2.36302600 |
| H | 3.67734400   | -2.70359700 | 1.91706600  |
| H | 8.27066900   | -2.63632100 | 0.11686100  |
| H | -3.62509600  | 2.74359500  | 1.56951600  |
| H | -7.88040800  | 2.71129300  | -0.93213100 |
| H | 4.47090800   | 2.77685300  | 1.80334100  |
| H | 3.25514400   | 4.85590700  | 2.22274300  |
| H | 0.77691700   | 4.83467500  | 2.45693200  |
| H | -0.46162400  | 2.73611400  | 2.27089700  |
| H | 11.34887900  | 2.83985900  | -2.56228100 |
| H | 10.45352400  | 4.97026000  | -1.71208900 |
| H | 8.48056700   | 4.97736200  | -0.19805400 |
| H | 7.38464900   | 2.89376900  | 0.43700400  |
| H | -4.42661300  | -2.75094100 | 1.39507000  |

|   |              |             |             |
|---|--------------|-------------|-------------|
| H | -3.24806600  | -4.84263500 | 1.85257400  |
| H | -0.79422300  | -4.83468300 | 2.27121500  |
| H | 0.45670100   | -2.73598700 | 2.23193100  |
| H | -11.58445800 | -2.91930600 | -2.13109500 |
| H | -10.22674600 | -4.96992300 | -2.25256200 |
| H | -7.78440700  | -4.87680400 | -1.79312100 |
| H | -6.70613500  | -2.77548800 | -1.18280600 |
| H | 7.63045200   | -5.58361800 | 1.73520900  |
| H | 7.01381900   | -5.84858700 | 0.10858900  |
| H | 8.49485400   | -4.91315100 | 0.34434300  |
| H | 5.33827700   | -5.62010000 | 2.63433500  |
| H | 3.73811400   | -4.98670900 | 2.22252100  |
| H | 4.68169900   | -5.88262400 | 1.02381400  |
| H | -5.27589800  | 5.75545700  | 1.87774800  |
| H | -3.66142900  | 5.03918100  | 1.76928000  |
| H | -4.36179200  | 5.88185400  | 0.38028800  |
| H | -6.47077500  | 5.85053300  | -0.93847000 |
| H | -8.02512300  | 5.00582600  | -0.90017800 |
| H | -7.38270000  | 5.75951500  | 0.56376300  |

**B7-7TQ:**

|   |             |             |             |
|---|-------------|-------------|-------------|
| S | 11.58214900 | 0.70952300  | -0.49457700 |
| C | 12.76605800 | -0.54812900 | -0.78195200 |
| C | 12.10553600 | -1.80425500 | -1.08642900 |
| C | 10.68299200 | -1.70443300 | -1.07320400 |
| C | 10.18672100 | -0.38279600 | -0.71387900 |
| C | 8.89870000  | 0.04533700  | -0.46730200 |
| C | 14.11556200 | -0.23503900 | -0.70201400 |
| S | 7.55799200  | -1.10844900 | -0.32550900 |
| C | 6.34815200  | 0.12813200  | 0.09787400  |
| C | 7.01636100  | 1.41899200  | 0.16895000  |
| C | 8.38991600  | 1.38566800  | -0.19554200 |
| C | 5.01042800  | -0.18516300 | 0.21315700  |
| C | 4.35227100  | -1.48658200 | 0.21508500  |
| C | 2.92911400  | -1.41602600 | 0.15699400  |
| C | 2.39834600  | -0.06143200 | 0.23409600  |
| S | 3.76327500  | 1.08140700  | 0.25581900  |
| C | 1.09621800  | 0.36864900  | 0.37902400  |
| S | -0.22285700 | -0.76838300 | 0.74183300  |
| C | -1.45285300 | 0.50063900  | 0.95261800  |
| C | -0.81853500 | 1.79878000  | 0.75588900  |
| C | 0.55603300  | 1.72258100  | 0.38372200  |
| C | -2.77713200 | 0.18299900  | 1.16538300  |
| C | -3.39548200 | -1.10286700 | 1.46208700  |
| C | -4.81648100 | -1.08470200 | 1.43838800  |
| C | -5.38978300 | 0.22093400  | 1.13025400  |
| S | -4.06579300 | 1.39994000  | 0.99536300  |
| C | -6.69774500 | 0.58222500  | 0.88847700  |
| S | -7.95953900 | -0.64634900 | 0.62096000  |
| C | -9.20073100 | 0.52564900  | 0.14370800  |
| C | -8.66320400 | 1.87319600  | 0.32084400  |
| C | -7.29431500 | 1.90037200  | 0.71903700  |
| C | 6.45469700  | 2.64465500  | 0.56740100  |
| C | 7.18047100  | 3.83242900  | 0.53273000  |
| C | 8.51919400  | 3.81403900  | 0.07154300  |
| C | 9.09826600  | 2.59689200  | -0.27643100 |
| C | -2.74069400 | -2.29319900 | 1.82148600  |

|   |              |             |             |
|---|--------------|-------------|-------------|
| C | -3.44168900  | -3.45736600 | 2.12614600  |
| C | -4.85651000  | -3.43991000 | 2.09939100  |
| C | -5.51445000  | -2.25766200 | 1.77023100  |
| C | 4.97280400   | -2.74718700 | 0.28640800  |
| C | 4.21812900   | -3.91080000 | 0.20292600  |
| C | 2.83171000   | -3.83919200 | 0.03723800  |
| C | 2.19108700   | -2.60640500 | 0.01983600  |
| C | 12.73269900  | -3.02418500 | -1.39479600 |
| C | 11.96148900  | -4.13407100 | -1.71040900 |
| C | 10.56510300  | -4.03273500 | -1.74169500 |
| C | 9.92812400   | -2.83707700 | -1.43315200 |
| C | -1.41478800  | 3.06325000  | 0.91224800  |
| C | -0.70205500  | 4.22076700  | 0.62570200  |
| C | 0.61510300   | 4.14002400  | 0.16390000  |
| C | 1.24052100   | 2.90505600  | 0.04687600  |
| C | -9.36896800  | 3.08351700  | 0.19858800  |
| C | -8.73483300  | 4.29688600  | 0.43208600  |
| C | -7.39150800  | 4.32396800  | 0.81877000  |
| C | -6.68073200  | 3.14080400  | 0.97260000  |
| C | 9.32145700   | 5.08729700  | -0.02930300 |
| C | 6.53582700   | 5.12206700  | 0.97533000  |
| C | -2.69227100  | -4.70992600 | 2.50712500  |
| C | -5.65107400  | -4.67360000 | 2.44915800  |
| C | -10.41726400 | 0.11709500  | -0.36201100 |
| C | -11.00305700 | -1.21489300 | -0.44103700 |
| C | -12.22716500 | -1.26597600 | -1.17060500 |
| C | -12.65393200 | 0.03337700  | -1.65740400 |
| S | -11.51143400 | 1.26985100  | -1.17669600 |
| C | -13.77119700 | 0.39693800  | -2.39525500 |
| C | -10.52111100 | -2.40204200 | 0.14204900  |
| C | -11.20868300 | -3.59671100 | -0.03143800 |
| C | -12.39045500 | -3.64504700 | -0.78111800 |
| C | -12.90561700 | -2.48529500 | -1.34277300 |
| C | 14.52032200  | 1.09872000  | -0.39831200 |
| N | 14.82280100  | 2.19714100  | -0.15177000 |
| C | 15.16352100  | -1.17613900 | -0.90656100 |
| N | 16.03852300  | -1.92931900 | -1.06965300 |
| C | -13.98180400 | 1.76427900  | -2.74329700 |
| N | -14.13219000 | 2.88860100  | -3.01155100 |
| C | -14.75897400 | -0.52277100 | -2.84735600 |
| N | -15.58047000 | -1.25741200 | -3.22801000 |
| H | 5.44057700   | 2.68263400  | 0.94222000  |
| H | 10.11924200  | 2.61366100  | -0.63303400 |
| H | -1.66302700  | -2.31520500 | 1.91334600  |
| H | -6.59530600  | -2.25372800 | 1.81662400  |
| H | 6.04090100   | -2.82965800 | 0.43289000  |
| H | 4.71308200   | -4.87523000 | 0.25786500  |
| H | 2.24703700   | -4.74756500 | -0.06933400 |
| H | 1.12040200   | -2.57768700 | -0.12801900 |
| H | 13.81159000  | -3.10176500 | -1.39712700 |
| H | 12.44619300  | -5.07474500 | -1.95019000 |
| H | 9.96670800   | -4.89497100 | -2.01984900 |
| H | 8.85104300   | -2.78623000 | -1.50912500 |
| H | -2.42903500  | 3.15409900  | 1.27521100  |
| H | -1.17931700  | 5.18777400  | 0.74930900  |
| H | 1.15731000   | 5.04227800  | -0.10092800 |
| H | 2.25160000   | 2.86771700  | -0.33431300 |
| H | -10.42306600 | 3.09213700  | -0.04076200 |

|   |              |             |             |
|---|--------------|-------------|-------------|
| H | -9.29538100  | 5.22080100  | 0.33405700  |
| H | -6.90272200  | 5.27138100  | 1.02326800  |
| H | -5.66137000  | 3.18926100  | 1.32901300  |
| H | 8.84413500   | 5.81150000  | -0.69998700 |
| H | 9.42027900   | 5.57795500  | 0.94618900  |
| H | 10.32776300  | 4.89272900  | -0.40683900 |
| H | 7.09169900   | 5.58691000  | 1.79791600  |
| H | 6.50671700   | 5.85615700  | 0.16132900  |
| H | 5.51067400   | 4.95635900  | 1.31476100  |
| H | -2.96688400  | -5.05549000 | 3.51075600  |
| H | -2.91348200  | -5.53451200 | 1.81896700  |
| H | -1.61251900  | -4.54402700 | 2.49452100  |
| H | -5.42364200  | -5.02790300 | 3.46149100  |
| H | -6.72513700  | -4.48024500 | 2.39648400  |
| H | -5.42635500  | -5.50249400 | 1.76739800  |
| H | -9.62990400  | -2.39924400 | 0.75341100  |
| H | -10.82276400 | -4.50169000 | 0.42786700  |
| H | -12.91511900 | -4.58550300 | -0.91353400 |
| H | -13.83029100 | -2.52479100 | -1.90255400 |

**Anions:**

**2TQ:**

|   |             |             |             |
|---|-------------|-------------|-------------|
| C | 3.22165100  | 0.26598200  | 0.00017800  |
| S | 1.99156400  | -0.99769700 | -0.00031600 |
| C | 0.67625600  | 0.19665400  | 0.00023500  |
| C | 1.22012400  | 1.48970700  | 0.00074100  |
| C | 2.61032400  | 1.53490900  | 0.00070600  |
| C | -0.67621900 | -0.19678100 | 0.00015600  |
| C | -1.22024900 | -1.48975000 | 0.00014200  |
| C | -2.61041300 | -1.53483600 | 0.00002900  |
| C | -3.22161600 | -0.26583800 | -0.00002400 |
| S | -1.99151000 | 0.99769100  | 0.00005700  |
| C | -4.60403200 | 0.03106300  | -0.00012600 |
| C | 4.60402700  | -0.03104800 | 0.00003900  |
| C | 5.55043600  | 1.02426200  | 0.00018500  |
| N | 6.31303000  | 1.91046800  | 0.00004200  |
| C | -5.08495600 | 1.36238900  | -0.00072300 |
| N | -5.46683800 | 2.46778000  | -0.00123600 |
| C | 5.08489600  | -1.36238200 | -0.00029800 |
| N | 5.46682700  | -2.46775700 | -0.00084100 |
| C | -5.55036200 | -1.02431300 | 0.00036600  |
| N | -6.31297200 | -1.91050300 | 0.00090000  |
| H | 0.59411300  | 2.37566600  | 0.00118000  |
| H | 3.19507500  | 2.44677300  | 0.00107800  |
| H | -0.59429800 | -2.37575700 | 0.00019300  |
| H | -3.19529300 | -2.44661200 | 0.00000100  |

**3TQ:**

|   |             |             |             |
|---|-------------|-------------|-------------|
| S | -4.03732700 | 0.79877300  | -0.00017800 |
| C | -5.16400200 | -0.55245100 | -0.00010800 |

|   |             |             |             |
|---|-------------|-------------|-------------|
| C | -4.45696900 | -1.77022500 | 0.00022100  |
| C | -3.07735800 | -1.61480200 | 0.00038100  |
| C | -2.62319900 | -0.28458500 | 0.00018900  |
| C | -1.27594800 | 0.14984000  | 0.00017200  |
| C | -6.56499600 | -0.36063000 | -0.00034000 |
| S | -0.00001500 | -1.07088200 | -0.00015300 |
| C | 1.27594100  | 0.14980900  | 0.00014800  |
| C | 0.70675400  | 1.44216600  | 0.00036800  |
| C | -0.70673100 | 1.44218300  | 0.00041700  |
| C | 2.62318600  | -0.28461600 | 0.00014900  |
| C | 3.07735600  | -1.61483100 | 0.00039300  |
| C | 4.45696400  | -1.77024100 | 0.00032000  |
| C | 5.16398700  | -0.55245800 | -0.00003600 |
| S | 4.03730500  | 0.79875600  | -0.00021500 |
| C | 6.56497500  | -0.36062900 | -0.00022800 |
| C | -1.55619900 | 2.68615100  | 0.00090600  |
| C | 1.55627900  | 2.68609100  | 0.00046400  |
| C | -7.14191400 | 0.93181400  | -0.00056300 |
| N | -7.59919200 | 2.00820800  | -0.00078000 |
| C | 7.42795100  | -1.48482300 | -0.00020200 |
| N | 8.11887700  | -2.42795000 | -0.00012400 |
| C | 7.14189000  | 0.93181900  | -0.00044200 |
| N | 7.59920000  | 2.00820000  | -0.00063100 |
| C | -7.42795800 | -1.48483200 | -0.00031100 |
| N | -8.11885400 | -2.42798100 | 0.00019100  |
| H | -4.96696800 | -2.72579400 | 0.00036100  |
| H | -2.39078800 | -2.45456700 | 0.00066800  |
| H | 2.39078600  | -2.45459600 | 0.00070000  |
| H | 4.96697600  | -2.72580300 | 0.00051400  |
| H | -0.95185100 | 3.59358000  | 0.00139100  |
| H | -2.20631300 | 2.72934300  | -0.87990200 |
| H | -2.20642100 | 2.72848400  | 0.88167600  |
| H | 2.20643900  | 2.72882000  | -0.88033700 |
| H | 0.95199100  | 3.59355700  | 0.00045000  |
| H | 2.20647600  | 2.72878900  | 0.88123500  |

#### 4TQ:

|   |             |             |             |
|---|-------------|-------------|-------------|
| C | 7.14195200  | -0.26881600 | 0.00001400  |
| C | 6.55289500  | -1.55020300 | -0.00001900 |
| C | 5.16328400  | -1.52635200 | 0.00005600  |
| C | 4.59947900  | -0.24387000 | 0.00015400  |
| S | 5.89193600  | 0.97263600  | 0.00016600  |
| C | 3.23774300  | 0.12932400  | 0.00022900  |
| S | 1.94416400  | -1.07793200 | 0.00023600  |
| C | 0.68774800  | 0.16846600  | 0.00006300  |
| C | 1.28357500  | 1.43280800  | 0.00017800  |
| C | 2.67881400  | 1.41408000  | 0.00030900  |
| C | -0.68774700 | -0.16847300 | -0.00014200 |
| C | -1.28357400 | -1.43281400 | -0.00057000 |
| C | -2.67881400 | -1.41408600 | -0.00057700 |
| C | -3.23774100 | -0.12932900 | -0.00021900 |
| S | -1.94416200 | 1.07792600  | 0.00011600  |
| C | -4.59947900 | 0.24386700  | -0.00015300 |
| S | -5.89193800 | -0.97263700 | -0.00025900 |
| C | -7.14195200 | 0.26881900  | 0.00002400  |

|   |              |             |             |
|---|--------------|-------------|-------------|
| C | -6.55289300  | 1.55020500  | 0.00010600  |
| C | -5.16328000  | 1.52635100  | -0.00001200 |
| C | -8.51742100  | -0.05030500 | 0.00010000  |
| C | 8.51741800   | 0.05030900  | -0.00007900 |
| C | -9.48014000  | 0.99044000  | 0.00005000  |
| N | -10.25387700 | 1.86646500  | -0.00001700 |
| C | -8.97295200  | -1.39076900 | 0.00021600  |
| N | -9.32841700  | -2.50455800 | 0.00036700  |
| C | 8.97294700   | 1.39077300  | -0.00038200 |
| N | 9.32840400   | 2.50456400  | -0.00057700 |
| C | 9.48014000   | -0.99043300 | 0.00010200  |
| N | 10.25388600  | -1.86644900 | 0.00025000  |
| H | 7.15312800   | -2.45169400 | -0.00010200 |
| H | 4.55300200   | -2.42352000 | 0.00002200  |
| H | 0.69952200   | 2.34652100  | 0.00014100  |
| H | 3.29000800   | 2.30938500  | 0.00038600  |
| H | -0.69952200  | -2.34652800 | -0.00086400 |
| H | -3.29000800  | -2.30939100 | -0.00088600 |
| H | -7.15312400  | 2.45169800  | 0.00025800  |
| H | -4.55299700  | 2.42351800  | 0.00004000  |

5TQ:

|   |              |             |             |
|---|--------------|-------------|-------------|
| C | 9.10464700   | -0.22644500 | 0.00026700  |
| S | 7.83862500   | 0.99845100  | 0.00001000  |
| C | 6.56325700   | -0.23460400 | -0.00010000 |
| C | 7.14272500   | -1.50937800 | -0.00002000 |
| C | 8.53283600   | -1.51543000 | 0.00018300  |
| C | 5.19530600   | 0.12160300  | -0.00025300 |
| C | 4.62025600   | 1.39795300  | -0.00034800 |
| C | 3.22316900   | 1.39668600  | -0.00042500 |
| C | 2.64706900   | 0.12609900  | -0.00039700 |
| S | 3.91908700   | -1.10236000 | -0.00037300 |
| C | 1.27317200   | -0.23370700 | -0.00039800 |
| S | 0.00000000   | 0.99157900  | -0.00041500 |
| C | -1.27317200  | -0.23370700 | -0.00038600 |
| C | -0.69962000  | -1.50543600 | -0.00038500 |
| C | 0.69961900   | -1.50543600 | -0.00039100 |
| C | -2.64706900  | 0.12609900  | -0.00037100 |
| C | -3.22316900  | 1.39668600  | -0.00038600 |
| C | -4.62025700  | 1.39795200  | -0.00030600 |
| C | -5.19530700  | 0.12160300  | -0.00022800 |
| S | -3.91908700  | -1.10236100 | -0.00034400 |
| C | -6.56325700  | -0.23460400 | -0.00009000 |
| S | -7.83862500  | 0.99845100  | 0.00002200  |
| C | -9.10464600  | -0.22644500 | 0.00025900  |
| C | -8.53283600  | -1.51543000 | 0.00016300  |
| C | -7.14272500  | -1.50937800 | -0.00003000 |
| C | -10.47576300 | 0.11084100  | 0.00049800  |
| C | 10.47576400  | 0.11084100  | 0.00050800  |
| C | -11.45200700 | -0.91718200 | 0.00067900  |
| N | -12.23663900 | -1.78337700 | 0.00081500  |
| C | 10.91302300  | 1.45736900  | 0.00056200  |
| N | 11.25226600  | 2.57613900  | 0.00060900  |
| C | -10.91302200 | 1.45736900  | 0.00056400  |
| N | -11.25226600 | 2.57613800  | 0.00062500  |
| C | 11.45200700  | -0.91718200 | 0.00070500  |



|   |             |             |             |
|---|-------------|-------------|-------------|
| N | 12.23663900 | -1.78337700 | 0.00086200  |
| H | 6.54423900  | -2.41447000 | -0.00009800 |
| H | 9.14470800  | -2.40903400 | 0.00028100  |
| H | 5.21864700  | 2.30175200  | -0.00034400 |
| H | 2.62702900  | 2.30267500  | -0.00048900 |
| H | -1.29656000 | -2.41053800 | -0.00037800 |
| H | 1.29656000  | -2.41053800 | -0.00039000 |
| H | -2.62703000 | 2.30267400  | -0.00044100 |
| H | -5.21864800 | 2.30175100  | -0.00029300 |
| H | -9.14470800 | -2.40903400 | 0.00024600  |
| H | -6.54423900 | -2.41447000 | -0.00011500 |

6TQ:

|   |              |             |             |
|---|--------------|-------------|-------------|
| S | 9.80742500   | 0.97497600  | -0.00010700 |
| C | 11.06432000  | -0.25922600 | 0.00035100  |
| C | 10.48350000  | -1.54347000 | 0.00094400  |
| C | 9.09268200   | -1.52683300 | 0.00111400  |
| C | 8.52402300   | -0.24818800 | 0.00066700  |
| C | 7.15708300   | 0.11984800  | 0.00086000  |
| C | 12.43820700  | 0.06875600  | 0.00006200  |
| S | 5.87244000   | -1.09399000 | -0.00157400 |
| C | 4.61080400   | 0.14315400  | 0.00056200  |
| C | 5.19416700   | 1.40804700  | 0.00258900  |
| C | 6.59306500   | 1.39940200  | 0.00277000  |
| C | 3.23124000   | -0.20897600 | 0.00012200  |
| C | 2.64983200   | -1.47444800 | -0.00045000 |
| C | 1.24746200   | -1.46204200 | -0.00097300 |
| C | 0.68773200   | -0.18847800 | -0.00083000 |
| S | 1.96924200   | 1.02534400  | 0.00030800  |
| C | -0.68772900  | 0.18844000  | -0.00141700 |
| S | -1.96924000  | -1.02538100 | 0.00096300  |
| C | -3.23123900  | 0.20893900  | -0.00128200 |
| C | -2.64982800  | 1.47440800  | -0.00368600 |
| C | -1.24745900  | 1.46200200  | -0.00376500 |
| C | -4.61080200  | -0.14318200 | -0.00054000 |
| C | -5.19417700  | -1.40807100 | 0.00089700  |
| C | -6.59307400  | -1.39941700 | 0.00136100  |
| C | -7.15708500  | -0.11985700 | 0.00025900  |
| S | -5.87243200  | 1.09397400  | -0.00140400 |
| C | -8.52402000  | 0.24818800  | 0.00035300  |
| S | -9.80743500  | -0.97496300 | -0.00042200 |
| C | -11.06431700 | 0.25925000  | 0.00057500  |
| C | -10.48348300 | 1.54349100  | 0.00122100  |
| C | -9.09266700  | 1.52684000  | 0.00109500  |
| C | -12.43820600 | -0.06871100 | 0.00059400  |
| C | -13.40731300 | 0.96593000  | 0.00162300  |
| N | -14.18570300 | 1.83772700  | 0.00231100  |
| C | 13.40732900  | -0.96587100 | 0.00030300  |
| N | 14.18572700  | -1.83766200 | 0.00038800  |
| C | 12.88426000  | 1.41232700  | -0.00052100 |
| N | 13.23008800  | 2.52909000  | -0.00093900 |
| C | -12.88428400 | -1.41227500 | -0.00047100 |
| N | -13.23013600 | -2.52903000 | -0.00132900 |

|   |              |             |             |
|---|--------------|-------------|-------------|
| H | 11.08844800  | -2.44175800 | 0.00132100  |
| H | 8.48752400   | -2.42745900 | 0.00172900  |
| H | 4.60494200   | 2.31857900  | 0.00423600  |
| H | 7.19777700   | 2.29892400  | 0.00459600  |
| H | 3.23877000   | -2.38464800 | -0.00045700 |
| H | 0.64360100   | -2.36265800 | -0.00159100 |
| H | -3.23876400  | 2.38460800  | -0.00547800 |
| H | -0.64359800  | 2.36261700  | -0.00568500 |
| H | -4.60496300  | -2.31861100 | 0.00164700  |
| H | -7.19779200  | -2.29893500 | 0.00261300  |
| H | -11.08842300 | 2.44178500  | 0.00182200  |
| H | -8.48749700  | 2.42745800  | 0.00165300  |

7TQ:

|   |              |             |             |
|---|--------------|-------------|-------------|
| S | 11.76286900  | 1.00886300  | 0.00367300  |
| C | 13.02834600  | -0.21653500 | 0.00233100  |
| C | 12.45715500  | -1.50418400 | 0.00029500  |
| C | 11.06527600  | -1.49698200 | -0.00017200 |
| C | 10.48911100  | -0.22276200 | 0.00149700  |
| C | 9.11779000   | 0.13711000  | 0.00157500  |
| C | 14.40033800  | 0.12210400  | 0.00326800  |
| S | 7.84303500   | -1.08610700 | -0.00163300 |
| C | 6.57298200   | 0.14055000  | 0.00046900  |
| C | 7.14458800   | 1.40874100  | 0.00328800  |
| C | 8.54538800   | 1.41110700  | 0.00390800  |
| C | 5.19362600   | -0.22501600 | -0.00071800 |
| C | 4.62415200   | -1.49356900 | -0.00088500 |
| C | 3.21912500   | -1.49151900 | -0.00207600 |
| C | 2.65219400   | -0.22417800 | -0.00285200 |
| S | 3.92303600   | 0.99863000  | -0.00232400 |
| C | 1.27027400   | 0.14570600  | -0.00395000 |
| S | -0.00000400  | -1.07706400 | -0.00067600 |
| C | -1.27027900  | 0.14570600  | -0.00493100 |
| C | -0.70312600  | 1.41279700  | -0.00797100 |
| C | 0.70312800   | 1.41279700  | -0.00742500 |
| C | -2.65219700  | -0.22417300 | -0.00480200 |
| C | -3.21913100  | -1.49151400 | -0.00686800 |
| C | -4.62415200  | -1.49356600 | -0.00663700 |
| C | -5.19363200  | -0.22501300 | -0.00438200 |
| S | -3.92303700  | 0.99863100  | -0.00155000 |
| C | -6.57298000  | 0.14054400  | -0.00401500 |
| S | -7.84302700  | -1.08611200 | 0.00142200  |
| C | -9.11779100  | 0.13709100  | -0.00160300 |
| C | -8.54539400  | 1.41109300  | -0.00616500 |
| C | -7.14460300  | 1.40873200  | -0.00752000 |
| C | -10.48909800 | -0.22277100 | 0.00065500  |
| C | -11.06528100 | -1.49698800 | 0.00259500  |
| C | -12.45714400 | -1.50418100 | 0.00446800  |
| C | -13.02834300 | -0.21652300 | 0.00405500  |
| S | -11.76285800 | 1.00886300  | 0.00129500  |
| C | -14.40031800 | 0.12210000  | 0.00556100  |
| C | -15.37696100 | -0.90508800 | 0.00799900  |
| N | -16.16158000 | -1.77128500 | 0.00999900  |
| C | -14.83586900 | 1.46885300  | 0.00468800  |
| N | -15.17284300 | 2.58833200  | 0.00393900  |
| C | 14.83587600  | 1.46885200  | 0.00545500  |
| N | 15.17282100  | 2.58834100  | 0.00726000  |

|   |              |             |             |
|---|--------------|-------------|-------------|
| C | 15.37697400  | -0.90508600 | 0.00200000  |
| N | 16.16155800  | -1.77131900 | 0.00090700  |
| H | 13.06815600  | -2.39836200 | -0.00074300 |
| H | 10.46629000  | -2.40169700 | -0.00160700 |
| H | 6.54853500   | 2.31482500  | 0.00512000  |
| H | 9.14286400   | 2.31542700  | 0.00617400  |
| H | 5.21974600   | -2.39935800 | 0.00000200  |
| H | 2.62250500   | -2.39699600 | -0.00243200 |
| H | -1.29899200  | 2.31858500  | -0.01110600 |
| H | 1.29899700   | 2.31858500  | -0.00999200 |
| H | -2.62250500  | -2.39698500 | -0.00926200 |
| H | -5.21975300  | -2.39934900 | -0.00886100 |
| H | -9.14288300  | 2.31540300  | -0.00894000 |
| H | -6.54854800  | 2.31480800  | -0.01157700 |
| H | -10.46630100 | -2.40170900 | 0.00238700  |
| H | -13.06815000 | -2.39835500 | 0.00598000  |

#### B2-2TQ:

|   |             |             |             |
|---|-------------|-------------|-------------|
| C | 3.24240400  | 0.30979700  | 0.12021300  |
| S | 1.78856100  | 1.28458600  | 0.15255900  |
| C | 0.69742600  | -0.08818100 | -0.13069100 |
| C | 1.48647400  | -1.27934600 | -0.25332200 |
| C | 2.90056500  | -1.06322500 | -0.09885800 |
| C | -0.69746800 | 0.08823100  | -0.13082600 |
| C | -1.48651500 | 1.27939700  | -0.25339600 |
| C | -2.90061700 | 1.06324200  | -0.09901100 |
| C | -3.24244200 | -0.30977100 | 0.12010500  |
| S | -1.78858200 | -1.28455600 | 0.15236200  |
| C | -4.49517300 | -0.93747200 | 0.29132600  |
| C | 4.49516500  | 0.93738600  | 0.29135400  |
| C | -1.03454000 | 2.59147000  | -0.54621900 |
| C | -1.93206800 | 3.63686100  | -0.63469000 |
| C | -3.31486400 | 3.42456200  | -0.44375000 |
| C | -3.79596700 | 2.15615400  | -0.18880900 |
| C | 1.03450800  | -2.59139400 | -0.54627000 |
| C | 1.93204100  | -3.63679300 | -0.63469700 |
| C | 3.31481100  | -3.42453300 | -0.44357900 |
| C | 3.79590600  | -2.15612900 | -0.18856100 |
| C | -5.73073900 | -0.24352900 | 0.28295300  |
| N | -6.76338000 | 0.30555700  | 0.28034600  |
| C | -4.57604800 | -2.34190800 | 0.48391700  |
| N | -4.63143800 | -3.49926000 | 0.63844500  |
| C | 4.57618200  | 2.34183200  | 0.48408300  |
| N | 4.63171900  | 3.49918200  | 0.63854500  |
| C | 5.73071900  | 0.24341300  | 0.28273000  |
| N | 6.76337700  | -0.30563700 | 0.27980000  |
| H | 0.01513800  | 2.78276100  | -0.72666500 |
| H | -1.56557200 | 4.63404500  | -0.86150800 |
| H | -4.00585400 | 4.25962900  | -0.51059400 |
| H | -4.85900300 | 1.99630900  | -0.06275000 |
| H | -0.01515300 | -2.78265700 | -0.72684000 |
| H | 1.56554700  | -4.63395100 | -0.86163300 |
| H | 4.00580000  | -4.25960500 | -0.51034500 |
| H | 4.85893500  | -1.99630500 | -0.06237900 |

B3-3TQ:

|   |             |             |             |
|---|-------------|-------------|-------------|
| S | 3.94445800  | 0.89420200  | -0.20908700 |
| C | 5.21601000  | -0.29957900 | -0.07299500 |
| C | 4.65506400  | -1.57221500 | 0.27930500  |
| C | 3.22759200  | -1.53594300 | 0.44261600  |
| C | 2.64235100  | -0.25030600 | 0.19076200  |
| C | 1.29690200  | 0.14212500  | 0.14337400  |
| C | 6.55145000  | 0.09006900  | -0.29805800 |
| S | 0.00002100  | -1.05314500 | -0.00052300 |
| C | -1.29692000 | 0.14214300  | -0.14377200 |
| C | -0.70993800 | 1.45405600  | -0.09820200 |
| C | 0.70991000  | 1.45402800  | 0.09821300  |
| C | -2.64236300 | -0.25030600 | -0.19113500 |
| C | -3.22759900 | -1.53603000 | -0.44262300 |
| C | -4.65505800 | -1.57229900 | -0.27917900 |
| C | -5.21602800 | -0.29955900 | 0.07269400  |
| S | -3.94450700 | 0.89431000  | 0.20830300  |
| C | -6.55147000 | 0.09014000  | 0.29763700  |
| C | -1.36430600 | 2.69367400  | -0.24701800 |
| C | -0.69821700 | 3.90886600  | -0.13962600 |
| C | 0.69819700  | 3.90880900  | 0.14068400  |
| C | 1.36428100  | 2.69357600  | 0.24758000  |
| C | -1.51726900 | 5.16974200  | -0.33101300 |
| C | 1.51739700  | 5.16959300  | 0.33212000  |
| C | 5.35988800  | -2.78152500 | 0.48224600  |
| C | 4.67977100  | -3.92328000 | 0.85907200  |
| C | 3.28456500  | -3.88380200 | 1.06301300  |
| C | 2.56943400  | -2.71843000 | 0.86397800  |
| C | -2.56945500 | -2.71865500 | -0.86361500 |
| C | -3.28455000 | -3.88415900 | -1.06203000 |
| C | -4.67971300 | -3.92363900 | -0.85783000 |
| C | -5.35983900 | -2.78174500 | -0.48143900 |
| C | -6.85986600 | 1.43578500  | 0.63057700  |
| N | -7.09735100 | 2.53643400  | 0.89804600  |
| C | 7.65546200  | -0.79473500 | -0.21255900 |
| N | 8.57519700  | -1.49933700 | -0.14941900 |
| C | -7.65551800 | -0.79460400 | 0.21197800  |
| N | -8.57528300 | -1.49915400 | 0.14869800  |
| C | 6.85986600  | 1.43568900  | -0.63107700 |
| N | 7.09737400  | 2.53631800  | -0.89860700 |
| H | -2.42391600 | 2.71791100  | -0.47111100 |
| H | 2.42389700  | 2.71768300  | 0.47168700  |
| H | -0.97040300 | 6.08141600  | -0.08962900 |
| H | -1.86032100 | 5.25973400  | -1.36874300 |
| H | -2.41237200 | 5.14800600  | 0.29928300  |
| H | 0.96915200  | 6.08163600  | 0.09534700  |
| H | 1.86456800  | 5.25691500  | 1.36868500  |
| H | 2.41001500  | 5.15000700  | -0.30179700 |
| H | 6.43352200  | -2.81167400 | 0.34891600  |
| H | 5.22512200  | -4.84934000 | 1.01383200  |
| H | 2.76228800  | -4.77842700 | 1.39055600  |
| H | 1.50578100  | -2.71181700 | 1.06306600  |
| H | -1.50585500 | -2.71207600 | -1.06296900 |
| H | -2.76227100 | -4.77888600 | -1.38929300 |
| H | -5.22503000 | -4.84980900 | -1.01205500 |

H -6.43345400 -2.81188600 -0.34795500

**B4-4TQ:**

C 7.18414000 0.17155000 0.05866600  
C 6.68332000 -1.09169900 -0.41038300  
C 5.25378200 -1.11907700 -0.54031800  
C 4.60633400 0.10202800 -0.14854500  
S 5.85538200 1.27342100 0.33795600  
C 3.24424300 0.40829400 -0.03414600  
S 2.02111400 -0.86795800 0.00080400  
C 0.66127800 0.23247700 0.28127000  
C 1.17210000 1.57105100 0.37678300  
C 2.58809600 1.67567200 0.16010900  
C -0.66127400 -0.23246300 0.28124800  
C -1.17209800 -1.57103800 0.37674000  
C -2.58809200 -1.67565400 0.16004700  
C -3.24423500 -0.40827600 -0.03421000  
S -2.02110100 0.86797200 0.00074200  
C -4.60632900 -0.10201800 -0.14860300  
S -5.85535700 -1.27343100 0.33789600  
C -7.18412900 -0.17156300 0.05866600  
C -6.68333200 1.09168700 -0.41040400  
C -5.25379800 1.11907900 -0.54037600  
C -8.49914300 -0.60730500 0.29674300  
C 8.49916500 0.60729000 0.29669100  
C -7.44804300 2.23118300 -0.74681800  
C -6.82179300 3.36796900 -1.22248700  
C -5.42318400 3.38704500 -1.39292300  
C -4.65028300 2.28889800 -1.06394800  
C -0.43833100 -2.74420800 0.67850800  
C -1.05902000 -3.97862400 0.68409800  
C -2.42985400 -4.09029300 0.37953500  
C -3.18316300 -2.95931400 0.12783900  
C 0.43832500 2.74421900 0.67854400  
C 1.05901000 3.97863600 0.68414400  
C 2.42984700 4.09031000 0.37959500  
C 3.18316200 2.95933400 0.12790500  
C 7.44800900 -2.23120500 -0.74681100  
C 6.82173400 -3.36798800 -1.22245300  
C 5.42311900 -3.38705300 -1.39284700  
C 4.65023900 -2.28889500 -1.06386000  
C -9.64657100 0.20395500 0.10306200  
N -10.60740400 0.85186100 -0.04819500  
C -8.74486500 -1.92960300 0.75678200  
N -8.93234700 -3.02003500 1.13131100  
C 9.64658400 -0.20397300 0.10296800  
N 10.60741300 -0.85187700 -0.04832200  
C 8.74490700 1.92958900 0.75671600  
N 8.93241000 3.02003100 1.13120400  
H -8.52469500 2.21341300 -0.63906100  
H -7.41277600 4.24156000 -1.47979200  
H -4.94158900 4.27299400 -1.79718600  
H -3.58347400 2.32386700 -1.24065300  
H 0.61141900 -2.67951800 0.93399600  
H -0.48217600 -4.86748800 0.92219800  
H -2.90307200 -5.06705100 0.35066800  
H -4.23212100 -3.07108800 -0.11314300

|   |             |             |             |
|---|-------------|-------------|-------------|
| H | -0.61142900 | 2.67952500  | 0.93401700  |
| H | 0.48216000  | 4.86749800  | 0.92223800  |
| H | 2.90306100  | 5.06707000  | 0.35073100  |
| H | 4.23212000  | 3.07111300  | -0.11307000 |
| H | 8.52466500  | -2.21344500 | -0.63908500 |
| H | 7.41270100  | -4.24158700 | -1.47977000 |
| H | 4.94150400  | -4.27300000 | -1.79708700 |
| H | 3.58342400  | -2.32385400 | -1.24053100 |

**B5-5TQ:**

|   |             |             |             |
|---|-------------|-------------|-------------|
| C | -8.99354800 | 0.39509800  | -0.28341200 |
| S | -7.66310400 | 1.48699900  | -0.59737000 |
| C | -6.41935100 | 0.34419400  | -0.02933400 |
| C | -7.07509500 | -0.85605200 | 0.41678600  |
| C | -8.49642800 | -0.83860300 | 0.26218300  |
| C | -5.05833100 | 0.64383000  | -0.13781100 |
| C | -4.39740800 | 1.89845500  | -0.40641300 |
| C | -2.97777800 | 1.78147100  | -0.58363900 |
| C | -2.46735800 | 0.45340300  | -0.38269300 |
| S | -3.83378200 | -0.62898000 | -0.05544100 |
| C | -1.14645600 | -0.00632200 | -0.31928400 |
| S | 0.20894300  | 1.11428100  | -0.10796700 |
| C | 1.43220700  | -0.15793600 | 0.04516900  |
| C | 0.77629000  | -1.43503900 | -0.04510800 |
| C | -0.63504400 | -1.35080300 | -0.29555700 |
| C | 2.79479600  | 0.15160800  | 0.13157700  |
| C | 3.44678400  | 1.40380900  | 0.39728900  |
| C | 4.86766300  | 1.37299800  | 0.23301200  |
| C | 5.39233800  | 0.07100100  | -0.09478700 |
| S | 4.03822500  | -1.05645900 | -0.24386300 |
| C | 6.71559500  | -0.36818700 | -0.21163700 |
| S | 8.06532800  | 0.60499400  | 0.42278200  |
| C | 9.27809800  | -0.60049100 | 0.05906300  |
| C | 8.66258500  | -1.74744800 | -0.55318300 |
| C | 7.24379600  | -1.60619700 | -0.71691900 |
| C | 10.62190500 | -0.33783000 | 0.37281900  |
| C | -6.48874000 | -1.99653500 | 1.01185500  |
| C | -7.24755200 | -3.09178100 | 1.39669300  |
| C | -8.65912500 | -3.08461500 | 1.19819900  |
| C | -9.25706200 | -1.96250900 | 0.64823100  |
| C | 2.84312000  | 2.61258700  | 0.81447400  |
| C | 3.57560600  | 3.77507300  | 0.99114100  |
| C | 4.97725800  | 3.76656700  | 0.73359500  |
| C | 5.59119400  | 2.57902100  | 0.37030500  |
| C | -4.99404100 | 3.17855000  | -0.47583400 |
| C | -4.23647600 | 4.29253100  | -0.78819700 |
| C | -2.86019200 | 4.16276700  | -1.05285600 |
| C | -2.23846200 | 2.93247800  | -0.94826000 |
| C | 1.36780600  | -2.71135600 | 0.11115500  |
| C | 0.61801200  | -3.86009600 | -0.06059100 |
| C | -0.74454400 | -3.77609000 | -0.40566200 |
| C | -1.36298200 | -2.54450100 | -0.51560700 |
| C | 9.31439800  | -2.92149000 | -0.99124800 |
| C | 8.58839600  | -3.92932800 | -1.59853100 |
| C | 7.20248200  | -3.77949700 | -1.80031700 |
| C | 6.53852600  | -2.64362900 | -1.37407000 |

|   |              |             |             |
|---|--------------|-------------|-------------|
| C | -9.50089600  | -4.27256500 | 1.59623400  |
| C | -6.57354500  | -4.28321100 | 2.03228300  |
| C | 2.88766000   | 5.03868900  | 1.44666000  |
| C | 5.79192900   | 5.03021300  | 0.86459700  |
| C | -10.30419000 | 0.81030800  | -0.56892700 |
| C | 10.98887100  | 0.89669300  | 0.97482600  |
| N | 11.27447900  | 1.91730000  | 1.46578100  |
| C | 11.68330700  | -1.24549600 | 0.12309400  |
| N | 12.57469200  | -1.97556400 | -0.07179300 |
| C | -11.45147100 | 0.00342200  | -0.35416500 |
| N | -12.41142900 | -0.64153100 | -0.18680200 |
| C | -10.54719700 | 2.10521700  | -1.10348600 |
| N | -10.73268300 | 3.17287800  | -1.53907100 |
| H | -5.42437400  | -2.01914600 | 1.20751900  |
| H | -10.33216600 | -1.95159800 | 0.52005900  |
| H | 1.78256500   | 2.63754500  | 1.03171500  |
| H | 6.65504200   | 2.59774800  | 0.17049200  |
| H | -6.04804000  | 3.30487500  | -0.26659100 |
| H | -4.71143200  | 5.26754800  | -0.83741100 |
| H | -2.27813300  | 5.03428100  | -1.33795600 |
| H | -1.18321200  | 2.85318000  | -1.17476800 |
| H | 2.40933600   | -2.79893400 | 0.39186900  |
| H | 1.08769300   | -4.83108900 | 0.06573200  |
| H | -1.31738500  | -4.68184500 | -0.58138100 |
| H | -2.40684400  | -2.50206500 | -0.79828400 |
| H | 10.38279200  | -3.03108400 | -0.85857300 |
| H | 9.09264400   | -4.83027300 | -1.93404700 |
| H | 6.64388800   | -4.56186700 | -2.30640300 |
| H | 5.48058500   | -2.54505100 | -1.57745700 |
| H | -9.19846700  | -5.18217300 | 1.06231900  |
| H | -9.41323800  | -4.49389800 | 2.66732000  |
| H | -10.55641200 | -4.09307100 | 1.37813100  |
| H | -6.96917500  | -4.48358100 | 3.03553500  |
| H | -6.73269100  | -5.19618400 | 1.44529500  |
| H | -5.49587800  | -4.12635100 | 2.12191300  |
| H | 3.31084800   | 5.41365400  | 2.38668300  |
| H | 2.99529900   | 5.84557500  | 0.71120100  |
| H | 1.81934200   | 4.87074400  | 1.60400500  |
| H | 5.43115400   | 5.81776600  | 0.19127400  |
| H | 5.74353300   | 5.43998000  | 1.88107600  |
| H | 6.84345400   | 4.84614400  | 0.63139500  |

**B6-6TQ:**

|   |             |             |             |
|---|-------------|-------------|-------------|
| S | 9.78947000  | -0.99449500 | -0.17972300 |
| C | 11.05347000 | 0.11012400  | -0.66512100 |
| C | 10.53444000 | 1.45093100  | -0.73399400 |
| C | 9.14453500  | 1.53729300  | -0.38927200 |
| C | 8.54150200  | 0.27047100  | -0.06159700 |
| C | 7.21408200  | -0.05677000 | 0.23140500  |
| C | 12.34107200 | -0.38931700 | -0.91277500 |
| S | 5.90486900  | 1.08541600  | -0.08396100 |
| C | 4.61066000  | -0.02449900 | 0.40357300  |
| C | 5.21165300  | -1.25936800 | 0.83066700  |
| C | 6.63920000  | -1.28159500 | 0.73887100  |
| C | 3.26451500  | 0.33136500  | 0.26916300  |

|   |              |             |             |
|---|--------------|-------------|-------------|
| C | 2.65817400   | 1.62059000  | 0.04700600  |
| C | 1.24380900   | 1.56668700  | -0.19122600 |
| C | 0.68037700   | 0.24693900  | -0.08810400 |
| S | 1.99329700   | -0.89974700 | 0.23265300  |
| C | -0.65594500  | -0.16702700 | -0.11132700 |
| S | -1.98209400  | 0.99105800  | 0.09425800  |
| C | -3.25346500  | -0.24158100 | 0.12393000  |
| C | -2.63674800  | -1.53756500 | -0.00098400 |
| C | -1.21349500  | -1.49183100 | -0.18021400 |
| C | -4.60568300  | 0.11157100  | 0.16437600  |
| C | -5.22679700  | 1.37550900  | 0.45410900  |
| C | -6.63772500  | 1.40356000  | 0.22380600  |
| C | -7.19152800  | 0.13419900  | -0.18309600 |
| S | -5.87181900  | -1.03524700 | -0.31677200 |
| C | -8.52042600  | -0.24977000 | -0.38106600 |
| S | -9.86556100  | 0.75458800  | 0.21503000  |
| C | -11.10023200 | -0.39316500 | -0.24781100 |
| C | -10.49572700 | -1.54402000 | -0.86651800 |
| C | -9.06699500  | -1.45175800 | -0.95377700 |
| C | -12.44659300 | -0.09097100 | 0.00722500  |
| C | 4.55336100   | -2.38556100 | 1.37458000  |
| C | 5.24598900   | -3.51030500 | 1.79371300  |
| C | 6.66616200   | -3.53443700 | 1.69836500  |
| C | 7.32892300   | -2.42763800 | 1.19168700  |
| C | -4.60228000  | 2.54277100  | 0.94932700  |
| C | -5.30189400  | 3.72366700  | 1.14131900  |
| C | -6.68821000  | 3.77720500  | 0.81948800  |
| C | -7.32470100  | 2.62789500  | 0.37809900  |
| C | 3.29899300   | 2.88098600  | 0.07451100  |
| C | 2.59249500   | 4.03763700  | -0.19980700 |
| C | 1.22503300   | 3.97392900  | -0.52607000 |
| C | 0.55979500   | 2.76183100  | -0.51803400 |
| C | 11.25572900  | 2.61393900  | -1.08124700 |
| C | 10.62711200  | 3.84555600  | -1.07268300 |
| C | 9.27278400   | 3.94325400  | -0.70200200 |
| C | 8.54187200   | 2.81783100  | -0.36570600 |
| C | -3.27833200  | -2.79646900 | 0.06408100  |
| C | -2.56082200  | -3.96307500 | -0.12868100 |
| C | -1.18166500  | -3.91158200 | -0.40385500 |
| C | -0.51665000  | -2.69918000 | -0.42355300 |
| C | -11.16699400 | -2.67722500 | -1.37505900 |
| C | -10.44799800 | -3.69316400 | -1.97819500 |
| C | -9.04972100  | -3.59023800 | -2.10453500 |
| C | -8.36726700  | -2.49389700 | -1.60795200 |
| C | 7.44991600   | -4.73679000 | 2.16488900  |
| C | 4.49586800   | -4.68701800 | 2.36813700  |
| C | -4.59259800  | 4.94142700  | 1.68104000  |
| C | -7.46442700  | 5.06307600  | 0.96639200  |
| C | -12.79894400 | 1.13805000  | 0.62983600  |
| N | -13.07112300 | 2.15342900  | 1.13846200  |
| C | 13.43705300  | 0.41548800  | -1.31900100 |
| N | 14.35511000  | 1.05607000  | -1.65335500 |
| C | 12.61218600  | -1.77669100 | -0.75768200 |
| N | 12.81781400  | -2.91814400 | -0.62152100 |
| C | -13.52612200 | -0.95075900 | -0.32332800 |
| N | -14.43197500 | -1.64068500 | -0.58496700 |
| H | 3.47929800   | -2.37008900 | 1.50722300  |
| H | 8.41054500   | -2.45143600 | 1.17916400  |



|   |              |             |             |
|---|--------------|-------------|-------------|
| H | -3.55323500  | 2.52031300  | 1.21647700  |
| H | -8.37642000  | 2.69431500  | 0.13057400  |
| H | 4.34754600   | 2.95277200  | 0.33145100  |
| H | 3.10101800   | 4.99673600  | -0.17248000 |
| H | 0.68499900   | 4.88033900  | -0.78329400 |
| H | -0.48689800  | 2.73356500  | -0.79116400 |
| H | 12.30191300  | 2.54437700  | -1.34879700 |
| H | 11.18408800  | 4.73775900  | -1.34116800 |
| H | 8.79048500   | 4.91625800  | -0.67378000 |
| H | 7.51123300   | 2.93442000  | -0.06047900 |
| H | -4.33449100  | -2.85979200 | 0.29128100  |
| H | -3.06888100  | -4.92116300 | -0.07270500 |
| H | -0.63142900  | -4.82796400 | -0.59592100 |
| H | 0.54064700   | -2.68195000 | -0.65364000 |
| H | -12.24407300 | -2.74986600 | -1.30024000 |
| H | -10.96710100 | -4.56307900 | -2.36830400 |
| H | -8.49451800  | -4.37723700 | -2.60704900 |
| H | -7.29751000  | -2.43005200 | -1.75491100 |
| H | 7.27367300   | -4.95091900 | 3.22635800  |
| H | 7.16900000   | -5.64132900 | 1.61147000  |
| H | 8.52318900   | -4.58425600 | 2.02807700  |
| H | 4.81274900   | -4.90804000 | 3.39474600  |
| H | 3.41949300   | -4.49909300 | 2.38309300  |
| H | 4.66921300   | -5.59908700 | 1.78382100  |
| H | -5.04786800  | 5.29394600  | 2.61465900  |
| H | -3.53984200  | 4.72768200  | 1.88162000  |
| H | -4.63594800  | 5.78030500  | 0.97542300  |
| H | -7.04441200  | 5.86415000  | 0.34547700  |
| H | -8.50907300  | 4.92735600  | 0.67618500  |
| H | -7.45143000  | 5.42812200  | 2.00079400  |

**B7-7TQ:**

|   |             |             |             |
|---|-------------|-------------|-------------|
| S | 11.72532200 | 0.61796200  | 0.01350500  |
| C | 12.91573500 | -0.58892400 | -0.41358500 |
| C | 12.26412200 | -1.75761900 | -0.94786600 |
| C | 10.83707000 | -1.63171200 | -1.00156200 |
| C | 10.33767300 | -0.38319800 | -0.48407200 |
| C | 9.02684800  | 0.04581500  | -0.27099100 |
| C | 14.27486100 | -0.31055200 | -0.21256800 |
| S | 7.67337000  | -1.09174900 | -0.31368100 |
| C | 6.45078600  | 0.11250200  | 0.14272700  |
| C | 7.11403000  | 1.37212800  | 0.35557400  |
| C | 8.51754600  | 1.34990400  | 0.08755000  |
| C | 5.09089000  | -0.20328300 | 0.15278000  |
| C | 4.43560300  | -1.48746000 | 0.09347700  |
| C | 3.01026700  | -1.40867500 | -0.04690500 |
| C | 2.48937400  | -0.06654900 | -0.00905900 |
| S | 3.85228400  | 1.06214900  | 0.11506300  |
| C | 1.16731600  | 0.38336300  | 0.04076100  |
| S | -0.16622500 | -0.71853600 | 0.42383300  |
| C | -1.40456900 | 0.54774700  | 0.45959400  |
| C | -0.76995200 | 1.81424100  | 0.18924900  |
| C | 0.63552000  | 1.71690700  | -0.08234900 |
| C | -2.75507900 | 0.23064900  | 0.63426800  |
| C | -3.37592500 | -0.98429300 | 1.09598200  |

|   |              |             |             |
|---|--------------|-------------|-------------|
| C | -4.80538500  | -0.96730800 | 1.04573100  |
| C | -5.36213700  | 0.26194900  | 0.53530800  |
| S | -4.03192100  | 1.37043800  | 0.17417700  |
| C | -6.68819000  | 0.60765000  | 0.25906700  |
| S | -7.95040500  | -0.63365800 | 0.14248600  |
| C | -9.22062800  | 0.48498700  | -0.36455500 |
| C | -8.65480500  | 1.81251100  | -0.45049200 |
| C | -7.27300200  | 1.88152400  | -0.07195800 |
| C | 6.53474400   | 2.57812300  | 0.80918900  |
| C | 7.27067000   | 3.74766600  | 0.92466100  |
| C | 8.64756700   | 3.74716400  | 0.56432200  |
| C | 9.24071700   | 2.55986100  | 0.16308500  |
| C | -2.73368600  | -2.12046300 | 1.63700100  |
| C | -3.44430200  | -3.21838400 | 2.09679500  |
| C | -4.86651900  | -3.19981700 | 2.04993000  |
| C | -5.51341800  | -2.08319500 | 1.54350800  |
| C | 5.04527000   | -2.75929100 | 0.18781200  |
| C | 4.29218500   | -3.91297500 | 0.05850400  |
| C | 2.90853400   | -3.83321700 | -0.17984800 |
| C | 2.27527700   | -2.60395200 | -0.22583100 |
| C | 12.89182600  | -2.93527600 | -1.40708100 |
| C | 12.13018000  | -3.96482500 | -1.93048900 |
| C | 10.73267000  | -3.83145400 | -2.02469900 |
| C | 10.09270400  | -2.68971800 | -1.57449700 |
| C | -1.37649700  | 3.09159100  | 0.19620700  |
| C | -0.64645500  | 4.22106400  | -0.12717200 |
| C | 0.70960000   | 4.11264000  | -0.48442700 |
| C | 1.34218600   | 2.88280700  | -0.45897300 |
| C | -9.30726100  | 2.98747600  | -0.88740100 |
| C | -8.64922400  | 4.20420100  | -0.87835200 |
| C | -7.32079700  | 4.28571500  | -0.42462500 |
| C | -6.64057800  | 3.14635700  | -0.03511500 |
| C | 9.46186300   | 5.01615500  | 0.62708700  |
| C | 6.60857500   | 5.00903600  | 1.42230000  |
| C | -2.71008300  | -4.40702600 | 2.66757900  |
| C | -5.66902800  | -4.36702000 | 2.57099900  |
| C | -10.53542400 | 0.05061500  | -0.54315200 |
| C | -11.07026100 | -1.28410500 | -0.63185300 |
| C | -12.50217900 | -1.33822500 | -0.67841100 |
| C | -13.11869600 | -0.03628800 | -0.65854700 |
| S | -11.89149800 | 1.20606900  | -0.57269200 |
| C | -14.46916400 | 0.33722500  | -0.70131500 |
| C | -10.35129500 | -2.49974200 | -0.71800200 |
| C | -11.02438900 | -3.70650100 | -0.79749300 |
| C | -12.43064500 | -3.75399600 | -0.80036800 |
| C | -13.16461300 | -2.58226900 | -0.75178200 |
| C | 14.67640800  | 0.94285300  | 0.32699800  |
| N | 14.98820200  | 1.97830900  | 0.76738500  |
| C | 15.32211500  | -1.21816300 | -0.51982900 |
| N | 16.20175300  | -1.94704700 | -0.76376500 |
| C | -14.83337500 | 1.71209300  | -0.68011000 |
| N | -15.11539800 | 2.84501200  | -0.66516200 |
| C | -15.54360600 | -0.58804100 | -0.76723200 |
| N | -16.44497500 | -1.32911900 | -0.82112900 |
| H | 5.49349900   | 2.59827300  | 1.10497800  |
| H | 10.28643900  | 2.58556300  | -0.11510300 |
| H | -1.65622600  | -2.13468500 | 1.73760900  |
| H | -6.59521800  | -2.06748300 | 1.57313000  |

|   |              |             |             |
|---|--------------|-------------|-------------|
| H | 6.10522400   | -2.84379200 | 0.38836900  |
| H | 4.77645700   | -4.88175400 | 0.13599700  |
| H | 2.32847200   | -4.74025100 | -0.32213300 |
| H | 1.21275500   | -2.56641000 | -0.42699700 |
| H | 13.96836500  | -3.03261500 | -1.35744800 |
| H | 12.61578900  | -4.86932400 | -2.28313800 |
| H | 10.14326600  | -4.63057700 | -2.46520200 |
| H | 9.02133500   | -2.60568800 | -1.69665400 |
| H | -2.41628100  | 3.19927900  | 0.47470200  |
| H | -1.12959200  | 5.19351900  | -0.11514100 |
| H | 1.26659100   | 4.99665400  | -0.78019400 |
| H | 2.38017300   | 2.81915500  | -0.75778500 |
| H | -10.32425100 | 2.94791800  | -1.25382900 |
| H | -9.16586300  | 5.09638000  | -1.21812200 |
| H | -6.81842900  | 5.24781000  | -0.38658900 |
| H | -5.62270000  | 3.23639900  | 0.31954500  |
| H | 9.04614100   | 5.79751100  | -0.02113900 |
| H | 9.48748500   | 5.43104400  | 1.64223000  |
| H | 10.49397200  | 4.83732900  | 0.31620300  |
| H | 7.09860700   | 5.39337400  | 2.32519000  |
| H | 6.65482000   | 5.81111600  | 0.67538400  |
| H | 5.55650100   | 4.83449300  | 1.66063800  |
| H | -2.99687300  | -4.60047100 | 3.70856100  |
| H | -2.92917800  | -5.32411700 | 2.10677700  |
| H | -1.62879300  | -4.25104600 | 2.64258800  |
| H | -5.45739100  | -4.56702600 | 3.62863500  |
| H | -6.74166600  | -4.18100400 | 2.47515100  |
| H | -5.43997800  | -5.29099300 | 2.02559800  |
| H | -9.27037300  | -2.49803700 | -0.75620000 |
| H | -10.45367800 | -4.62814400 | -0.86791000 |
| H | -12.94308500 | -4.70922300 | -0.85731300 |
| H | -14.24563300 | -2.62207800 | -0.77761800 |

**Cations:**

**2TQ:**

|   |             |             |             |
|---|-------------|-------------|-------------|
| C | 3.17741400  | 0.25409800  | 0.00000300  |
| S | 1.95830100  | -1.01158600 | 0.00007500  |
| C | 0.67851300  | 0.18571400  | -0.00007000 |
| C | 1.20841300  | 1.50939400  | -0.00019400 |
| C | 2.57895800  | 1.55101100  | -0.00016200 |
| C | -0.67852500 | -0.18577900 | -0.00004500 |
| C | -1.20843300 | -1.50942600 | -0.00000300 |
| C | -2.57901300 | -1.55098900 | 0.00003000  |
| C | -3.17737100 | -0.25410300 | 0.00000600  |
| S | -1.95831000 | 1.01154400  | -0.00008900 |
| C | -4.54237300 | 0.03054100  | 0.00004700  |
| C | 4.54232400  | -0.03050600 | 0.00006800  |
| C | 5.49476400  | 1.02516000  | 0.00022300  |
| N | 6.25713200  | 1.90657200  | 0.00037400  |
| C | -5.01693100 | 1.37044800  | -0.00001800 |
| N | -5.36752300 | 2.48205200  | -0.00007100 |
| C | 5.01694500  | -1.37042100 | -0.00013800 |

|   |             |             |             |
|---|-------------|-------------|-------------|
| N | 5.36760800  | -2.48199700 | -0.00028200 |
| C | -5.49476900 | -1.02510900 | 0.00012100  |
| N | -6.25710400 | -1.90655800 | 0.00019200  |
| H | 0.58055900  | 2.39326000  | -0.00035800 |
| H | 3.17200100  | 2.45834000  | -0.00018300 |
| H | -0.58061700 | -2.39331700 | 0.00000800  |
| H | -3.17208900 | -2.45829800 | 0.00006800  |

3TQ:

|   |             |             |             |
|---|-------------|-------------|-------------|
| S | -3.98962700 | 0.81153200  | -0.00002900 |
| C | -5.10673300 | -0.54857400 | -0.00003200 |
| C | -4.40134400 | -1.78888300 | 0.00006300  |
| C | -3.04119000 | -1.63258600 | 0.00007400  |
| C | -2.60291700 | -0.27199000 | 0.00006800  |
| C | -1.25851700 | 0.15048400  | 0.00009000  |
| C | -6.48617400 | -0.37291600 | -0.00009600 |
| S | 0.00001000  | -1.07072600 | 0.00005500  |
| C | 1.25850900  | 0.15049700  | 0.00004000  |
| C | 0.70104800  | 1.46525100  | 0.00005400  |
| C | -0.70107400 | 1.46523800  | 0.00010800  |
| C | 2.60292400  | -0.27197200 | 0.00001100  |
| C | 3.04118400  | -1.63256100 | 0.00000500  |
| C | 4.40134800  | -1.78887000 | 0.00000400  |
| C | 5.10673200  | -0.54857200 | -0.00003700 |
| S | 3.98964400  | 0.81153900  | -0.00004200 |
| C | 6.48619400  | -0.37291400 | -0.00005900 |
| C | -1.55506200 | 2.70016200  | 0.00017400  |
| C | 1.55504200  | 2.70017000  | 0.00002100  |
| C | -7.06435400 | 0.92698100  | -0.00012200 |
| N | -7.49747900 | 2.00871100  | -0.00015600 |
| C | 7.35212600  | -1.50245100 | -0.00003900 |
| N | 8.03779800  | -2.44420400 | -0.00001700 |
| C | 7.06436000  | 0.92697700  | -0.00006400 |
| N | 7.49747500  | 2.00871300  | -0.00007900 |
| C | -7.35213100 | -1.50244300 | -0.00004900 |
| N | -8.03782500 | -2.44417900 | -0.00001700 |
| H | -4.91573400 | -2.74260000 | 0.00008200  |
| H | -2.34945800 | -2.46677300 | 0.00012000  |
| H | 2.34945100  | -2.46674700 | 0.00003000  |
| H | 4.91572500  | -2.74259400 | 0.00000400  |
| H | -0.95779700 | 3.61010100  | 0.00024200  |
| H | -2.19940900 | 2.73793200  | -0.88508100 |
| H | -2.19941200 | 2.73782300  | 0.88543300  |
| H | 2.19933100  | 2.73788100  | -0.88528200 |
| H | 0.95779500  | 3.61012000  | 0.00004800  |
| H | 2.19944000  | 2.73786900  | 0.88524100  |

4TQ:

|   |            |             |             |
|---|------------|-------------|-------------|
| C | 7.07999000 | -0.25650300 | 0.00009600  |
| C | 6.49110600 | -1.55769400 | -0.00021800 |
| C | 5.11971500 | -1.53232400 | -0.00032000 |
| C | 4.56769500 | -0.22067600 | -0.00011100 |

|   |              |             |             |
|---|--------------|-------------|-------------|
| S | 5.83970000   | 0.99410500  | 0.00020900  |
| C | 3.20878400   | 0.13533800  | -0.00013100 |
| S | 1.92998900   | -1.07540400 | -0.00044000 |
| C | 0.68685100   | 0.16356200  | -0.00022000 |
| C | 1.27079000   | 1.44862500  | 0.00002600  |
| C | 2.65237500   | 1.43374600  | 0.00004800  |
| C | -0.68684300  | -0.16361000 | -0.00028300 |
| C | -1.27080200  | -1.44865100 | -0.00022500 |
| C | -2.65240300  | -1.43374900 | -0.00021800 |
| C | -3.20876700  | -0.13533700 | -0.00023200 |
| S | -1.92998100  | 1.07537900  | -0.00045000 |
| C | -4.56770900  | 0.22071500  | -0.00014100 |
| S | -5.83970200  | -0.99407100 | 0.00018100  |
| C | -7.07998800  | 0.25652900  | 0.00012000  |
| C | -6.49113100  | 1.55770400  | -0.00014700 |
| C | -5.11971100  | 1.53234000  | -0.00028700 |
| C | -8.43784400  | -0.04127500 | 0.00032000  |
| C | 8.43781400   | 0.04126800  | 0.00027000  |
| C | -9.40075100  | 1.00722000  | 0.00010100  |
| N | -10.16699200 | 1.88461800  | -0.00011900 |
| C | -8.89821000  | -1.38724300 | 0.00065100  |
| N | -9.23451400  | -2.50289900 | 0.00091200  |
| C | 8.89822900   | 1.38723800  | 0.00050600  |
| N | 9.23457700   | 2.50287700  | 0.00068700  |
| C | 9.40073300   | -1.00723400 | 0.00016400  |
| N | 10.16699500  | -1.88461000 | 0.00007100  |
| H | 7.09495200   | -2.45741200 | -0.00031800 |
| H | 4.50340300   | -2.42406700 | -0.00057100 |
| H | 0.68266400   | 2.35903300  | 0.00019700  |
| H | 3.26114000   | 2.33065700  | 0.00023300  |
| H | -0.68270200  | -2.35907600 | -0.00015700 |
| H | -3.26117600  | -2.33065400 | -0.00015400 |
| H | -7.09496500  | 2.45742900  | -0.00020700 |
| H | -4.50342200  | 2.42409800  | -0.00050300 |

5TQ:

|   |             |             |             |
|---|-------------|-------------|-------------|
| C | 7.07999000  | -0.25650300 | 0.00009600  |
| C | 6.49110600  | -1.55769400 | -0.00021800 |
| C | 5.11971500  | -1.53232400 | -0.00032000 |
| C | 4.56769500  | -0.22067600 | -0.00011100 |
| S | 5.83970000  | 0.99410500  | 0.00020900  |
| C | 3.20878400  | 0.13533800  | -0.00013100 |
| S | 1.92998900  | -1.07540400 | -0.00044000 |
| C | 0.68685100  | 0.16356200  | -0.00022000 |
| C | 1.27079000  | 1.44862500  | 0.00002600  |
| C | 2.65237500  | 1.43374600  | 0.00004800  |
| C | -0.68684300 | -0.16361000 | -0.00028300 |
| C | -1.27080200 | -1.44865100 | -0.00022500 |
| C | -2.65240300 | -1.43374900 | -0.00021800 |
| C | -3.20876700 | -0.13533700 | -0.00023200 |
| S | -1.92998100 | 1.07537900  | -0.00045000 |
| C | -4.56770900 | 0.22071500  | -0.00014100 |
| S | -5.83970200 | -0.99407100 | 0.00018100  |
| C | -7.07998800 | 0.25652900  | 0.00012000  |
| C | -6.49113100 | 1.55770400  | -0.00014700 |

|   |              |             |             |
|---|--------------|-------------|-------------|
| C | -5.11971100  | 1.53234000  | -0.00028700 |
| C | -8.43784400  | -0.04127500 | 0.00032000  |
| C | 8.43781400   | 0.04126800  | 0.00027000  |
| C | -9.40075100  | 1.00722000  | 0.00010100  |
| N | -10.16699200 | 1.88461800  | -0.00011900 |
| C | -8.89821000  | -1.38724300 | 0.00065100  |
| N | -9.23451400  | -2.50289900 | 0.00091200  |
| C | 8.89822900   | 1.38723800  | 0.00050600  |
| N | 9.23457700   | 2.50287700  | 0.00068700  |
| C | 9.40073300   | -1.00723400 | 0.00016400  |
| N | 10.16699500  | -1.88461000 | 0.00007100  |
| H | 7.09495200   | -2.45741200 | -0.00031800 |
| H | 4.50340300   | -2.42406700 | -0.00057100 |
| H | 0.68266400   | 2.35903300  | 0.00019700  |
| H | 3.26114000   | 2.33065700  | 0.00023300  |
| H | -0.68270200  | -2.35907600 | -0.00015700 |
| H | -3.26117600  | -2.33065400 | -0.00015400 |
| H | -7.09496500  | 2.45742900  | -0.00020700 |
| H | -4.50342200  | 2.42409800  | -0.00050300 |

6TQ:

|   |              |             |             |
|---|--------------|-------------|-------------|
| S | 9.73979700   | 0.99468400  | -0.00033500 |
| C | 10.98993700  | -0.24603100 | -0.00007100 |
| C | 10.40939900  | -1.54890600 | 0.00022700  |
| C | 9.03576700   | -1.53329600 | 0.00029400  |
| C | 8.47261500   | -0.22995700 | 0.00005300  |
| C | 7.11143300   | 0.11923300  | 0.00009000  |
| C | 12.34710600  | 0.06202400  | -0.00015800 |
| S | 5.83711100   | -1.10031900 | -0.00003800 |
| C | 4.58480400   | 0.13078600  | 0.00014600  |
| C | 5.16040000   | 1.41533000  | 0.00027100  |
| C | 6.54547300   | 1.40997300  | 0.00022300  |
| C | 3.21027100   | -0.20813000 | 0.00015600  |
| C | 2.62940200   | -1.48560100 | 0.00047100  |
| C | 1.23992100   | -1.47163000 | 0.00048600  |
| C | 0.68509800   | -0.18265600 | 0.00010900  |
| S | 1.95837300   | 1.02786300  | -0.00025900 |
| C | -0.68507900  | 0.18268400  | 0.00000200  |
| S | -1.95835200  | -1.02785500 | 0.00043100  |
| C | -3.21024600  | 0.20811700  | -0.00001200 |
| C | -2.62941100  | 1.48559300  | -0.00043000 |
| C | -1.23991800  | 1.47164000  | -0.00041500 |
| C | -4.58480300  | -0.13082800 | 0.00005800  |
| C | -5.16039100  | -1.41534800 | 0.00018000  |
| C | -6.54549500  | -1.40997900 | 0.00016300  |
| C | -7.11141700  | -0.11925000 | 0.00008000  |
| S | -5.83710500  | 1.10028700  | -0.00005500 |
| C | -8.47263600  | 0.22998300  | 0.00012700  |
| S | -9.73980700  | -0.99465300 | -0.00051800 |
| C | -10.98994100 | 0.24606100  | 0.00002800  |
| C | -10.40942200 | 1.54891500  | 0.00064000  |
| C | -9.03575900  | 1.53330100  | 0.00068800  |
| C | -12.34713700 | -0.06202500 | -0.00015600 |
| C | -13.31621400 | 0.98045700  | 0.00023700  |
| N | -14.08704500 | 1.85410400  | 0.00059500  |
| C | 13.31618800  | -0.98046800 | 0.00002000  |

|   |              |             |             |
|---|--------------|-------------|-------------|
| N | 14.08702800  | -1.85410500 | 0.00019800  |
| C | 12.79845100  | 1.41053500  | -0.00039700 |
| N | 13.12876700  | 2.52823000  | -0.00057200 |
| C | -12.79844800 | -1.41053400 | -0.00071700 |
| N | -13.12873300 | -2.52824100 | -0.00115700 |
| H | 11.01931500  | -2.44429300 | 0.00042700  |
| H | 8.42629200   | -2.42978300 | 0.00054900  |
| H | 4.56649200   | 2.32195300  | 0.00043700  |
| H | 7.14795300   | 2.31107800  | 0.00035200  |
| H | 3.21745300   | -2.39610900 | 0.00076000  |
| H | 0.63382800   | -2.37018600 | 0.00074900  |
| H | -3.21747200  | 2.39609300  | -0.00076200 |
| H | -0.63384400  | 2.37021000  | -0.00072800 |
| H | -4.56650400  | -2.32198500 | 0.00026600  |
| H | -7.14797200  | -2.31108600 | 0.00027700  |
| H | -11.01932300 | 2.44431200  | 0.00107200  |
| H | -8.42629400  | 2.42979600  | 0.00117100  |

7TQ:

|   |              |             |             |
|---|--------------|-------------|-------------|
| S | 11.68632800  | 1.03368400  | 0.00068700  |
| C | 12.94858700  | -0.19451000 | 0.00097900  |
| C | 12.38059500  | -1.50149600 | 0.00111900  |
| C | 11.00554100  | -1.49896300 | 0.00099000  |
| C | 10.42998500  | -0.20305200 | 0.00074000  |
| C | 9.06467400   | 0.13504200  | 0.00061700  |
| C | 14.30387300  | 0.12737700  | 0.00099800  |
| S | 7.80123300   | -1.09605100 | -0.00078400 |
| C | 6.53704800   | 0.12349700  | 0.00006400  |
| C | 7.10039000   | 1.41141700  | 0.00125700  |
| C | 8.48718900   | 1.41892900  | 0.00153800  |
| C | 5.16447100   | -0.23010000 | -0.00050600 |
| C | 4.59560900   | -1.51067300 | -0.00158000 |
| C | 3.20389700   | -1.50907300 | -0.00179200 |
| C | 2.63824300   | -0.22711400 | -0.00097300 |
| S | 3.90070700   | 0.99451800  | 0.00010800  |
| C | 1.26303700   | 0.12829900  | -0.00094900 |
| S | 0.00001300   | -1.09448000 | -0.00129300 |
| C | -1.26300900  | 0.12828200  | -0.00137100 |
| C | -0.69636300  | 1.40855400  | -0.00092100 |
| C | 0.69636900   | 1.40856000  | -0.00063600 |
| C | -2.63822800  | -0.22714800 | -0.00179500 |
| C | -3.20388700  | -1.50908900 | -0.00296800 |
| C | -4.59562200  | -1.51067400 | -0.00291300 |
| C | -5.16444800  | -0.23009900 | -0.00176100 |
| S | -3.90068700  | 0.99450000  | -0.00078800 |
| C | -6.53705600  | 0.12353400  | -0.00140600 |
| S | -7.80123300  | -1.09601900 | 0.00036000  |
| C | -9.06467600  | 0.13507600  | -0.00038800 |
| C | -8.48720500  | 1.41894600  | -0.00181600 |
| C | -7.10038200  | 1.41143700  | -0.00234400 |
| C | -10.43000900 | -0.20304000 | 0.00045700  |
| C | -11.00551800 | -1.49896000 | 0.00173600  |
| C | -12.38059500 | -1.50152300 | 0.00232200  |
| C | -12.94857900 | -0.19454300 | 0.00152200  |
| S | -11.68636200 | 1.03367400  | 0.00001500  |
| C | -14.30385500 | 0.12737300  | 0.00183700  |

|   |              |             |             |
|---|--------------|-------------|-------------|
| C | -15.28262400 | -0.90569000 | 0.00306500  |
| N | -16.06163400 | -1.77224900 | 0.00409000  |
| C | -14.74225800 | 1.47980300  | 0.00094300  |
| N | -15.06281200 | 2.60050200  | 0.00020000  |
| C | 14.74223000  | 1.47981800  | 0.00110800  |
| N | 15.06275300  | 2.60052900  | 0.00122000  |
| C | 15.28260200  | -0.90571500 | 0.00099900  |
| N | 16.06166500  | -1.77223200 | 0.00098800  |
| H | 12.99868600  | -2.39119700 | 0.00134300  |
| H | 10.40495700  | -2.40145500 | 0.00117600  |
| H | 6.49836300   | 2.31267900  | 0.00196200  |
| H | 9.08110900   | 2.32567900  | 0.00255400  |
| H | 5.19154000   | -2.41605500 | -0.00212700 |
| H | 2.60604700   | -2.41312800 | -0.00256500 |
| H | -1.29294800  | 2.31347800  | -0.00086800 |
| H | 1.29294300   | 2.31349300  | -0.00036400 |
| H | -2.60606200  | -2.41316000 | -0.00392300 |
| H | -5.19155100  | -2.41605600 | -0.00389800 |
| H | -9.08111500  | 2.32570400  | -0.00253900 |
| H | -6.49837200  | 2.31271100  | -0.00360900 |
| H | -10.40489400 | -2.40142300 | 0.00217400  |
| H | -12.99868900 | -2.39122100 | 0.00328500  |

#### B2-2TQ:

|   |             |             |             |
|---|-------------|-------------|-------------|
| C | 3.18683800  | 0.34318600  | 0.15055000  |
| S | 1.71574700  | 1.30936400  | 0.13731800  |
| C | 0.70247400  | -0.07058200 | -0.22510300 |
| C | 1.50040200  | -1.26517800 | -0.38703300 |
| C | 2.89471600  | -1.04159800 | -0.15743100 |
| C | -0.70239000 | 0.07082700  | -0.22508400 |
| C | -1.50046400 | 1.26531500  | -0.38693100 |
| C | -2.89476800 | 1.04148000  | -0.15748800 |
| C | -3.18664200 | -0.34330000 | 0.15054500  |
| S | -1.71549900 | -1.30925400 | 0.13746600  |
| C | -4.38434800 | -0.97725400 | 0.43975400  |
| C | 4.38450900  | 0.97711700  | 0.43967800  |
| C | -1.06329200 | 2.54419900  | -0.78599500 |
| C | -1.98070500 | 3.58055100  | -0.89075900 |
| C | -3.34056100 | 3.36462000  | -0.62018000 |
| C | -3.80646300 | 2.10164100  | -0.26696200 |
| C | 1.06300000  | -2.54388600 | -0.78638100 |
| C | 1.98020300  | -3.58042800 | -0.89116200 |
| C | 3.34002600  | -3.36483000 | -0.62024100 |
| C | 3.80616200  | -2.10198300 | -0.26680100 |
| C | -5.63049500 | -0.29331600 | 0.51346800  |
| N | -6.65635600 | 0.25496600  | 0.57561200  |
| C | -4.41129500 | -2.38345900 | 0.68237700  |
| N | -4.39363700 | -3.53262900 | 0.87104800  |
| C | 4.41148000  | 2.38335100  | 0.68215200  |
| N | 4.39386900  | 3.53253200  | 0.87073600  |
| C | 5.63066900  | 0.29320500  | 0.51351800  |
| N | 6.65664700  | -0.25482800 | 0.57583000  |
| H | -0.02895500 | 2.73080300  | -1.04355100 |
| H | -1.64142000 | 4.56414200  | -1.19738400 |



|   |             |             |             |
|---|-------------|-------------|-------------|
| H | -4.04432300 | 4.18564500  | -0.70629900 |
| H | -4.86296500 | 1.95110100  | -0.09041500 |
| H | 0.02865100  | -2.73013500 | -1.04414500 |
| H | 1.64078400  | -4.56388300 | -1.19807500 |
| H | 4.04361700  | -4.18601300 | -0.70626400 |
| H | 4.86264800  | -1.95175500 | -0.08994800 |

**B3-3TQ:**

|   |             |             |             |
|---|-------------|-------------|-------------|
| S | 3.89896000  | 0.89919400  | -0.18468100 |
| C | 5.15719300  | -0.32698200 | -0.06566800 |
| C | 4.59132600  | -1.59911900 | 0.34282900  |
| C | 3.17923200  | -1.53324800 | 0.53907100  |
| C | 2.61692400  | -0.22814600 | 0.23999300  |
| C | 1.27389100  | 0.17028600  | 0.16878100  |
| C | 6.45944600  | 0.03511600  | -0.35202700 |
| S | -0.00002500 | -1.02813500 | -0.00005100 |
| C | -1.27388200 | 0.17032100  | -0.16890400 |
| C | -0.70629400 | 1.49419400  | -0.10965900 |
| C | 0.70633200  | 1.49417700  | 0.10943100  |
| C | -2.61694700 | -0.22806800 | -0.24000300 |
| C | -3.17931600 | -1.53310200 | -0.53920900 |
| C | -4.59139300 | -1.59896800 | -0.34283600 |
| C | -5.15717100 | -0.32689400 | 0.06593900  |
| S | -3.89889700 | 0.89922800  | 0.18505600  |
| C | -6.45940200 | 0.03514900  | 0.35250400  |
| C | -1.36879600 | 2.72606600  | -0.27766300 |
| C | -0.69644800 | 3.93523200  | -0.15790300 |
| C | 0.69654800  | 3.93522400  | 0.15745500  |
| C | 1.36886400  | 2.72604700  | 0.27733300  |
| C | -1.43675800 | 5.23147800  | -0.34811600 |
| C | 1.43692700  | 5.23146400  | 0.34742100  |
| C | 5.28337800  | -2.79673600 | 0.57791900  |
| C | 4.58422100  | -3.91189800 | 1.02797200  |
| C | 3.20610000  | -3.83978000 | 1.27090900  |
| C | 2.50467600  | -2.66332000 | 1.03836000  |
| C | -2.50483400 | -2.66311500 | -1.03874900 |
| C | -3.20632000 | -3.83950800 | -1.27143900 |
| C | -4.58442900 | -3.91161600 | -1.02840000 |
| C | -5.28351000 | -2.79651500 | -0.57808300 |
| C | -6.76366300 | 1.38510600  | 0.70604900  |
| N | -6.96990800 | 2.49618600  | 0.98712800  |
| C | 7.55254400  | -0.87802200 | -0.32052000 |
| N | 8.45401200  | -1.61499500 | -0.29841500 |
| C | -7.55247500 | -0.87801000 | 0.32092300  |
| N | -8.45387300 | -1.61506700 | 0.29875100  |
| C | 6.76372100  | 1.38514100  | -0.70531700 |
| N | 6.96998500  | 2.49627100  | -0.98618000 |
| H | -2.42113200 | 2.75592700  | -0.52765000 |
| H | 2.42119100  | 2.75591100  | 0.52735100  |
| H | -0.99474300 | 5.82527700  | -1.15598500 |
| H | -2.48744800 | 5.06034000  | -0.58934600 |
| H | -1.39381000 | 5.84834100  | 0.55655900  |
| H | 0.99453900  | 5.82580000  | 1.15468000  |
| H | 2.48745400  | 5.06030200  | 0.58934200  |
| H | 1.39459600  | 5.84781000  | -0.55764600 |

|   |             |             |             |
|---|-------------|-------------|-------------|
| H | 6.35237400  | -2.86029900 | 0.42544300  |
| H | 5.11930200  | -4.83704100 | 1.21375600  |
| H | 2.68082400  | -4.70588400 | 1.65951500  |
| H | 1.45157100  | -2.62372100 | 1.28311500  |
| H | -1.45174700 | -2.62350000 | -1.28358000 |
| H | -2.68111300 | -4.70556600 | -1.66023800 |
| H | -5.11956100 | -4.83670100 | -1.21432400 |
| H | -6.35250100 | -2.86005800 | -0.42554000 |

**B4-4TQ:**

|   |              |             |             |
|---|--------------|-------------|-------------|
| C | 7.12212500   | 0.17921200  | 0.09486500  |
| C | 6.63257800   | -1.09257000 | -0.40769000 |
| C | 5.22036000   | -1.10132100 | -0.60275300 |
| C | 4.57153800   | 0.14038200  | -0.20303600 |
| S | 5.79129200   | 1.31324600  | 0.30200900  |
| C | 3.21439600   | 0.44207600  | -0.10221700 |
| S | 2.00313900   | -0.83956100 | -0.11899100 |
| C | 0.66109200   | 0.24099500  | 0.19995300  |
| C | 1.14745600   | 1.59211500  | 0.33640800  |
| C | 2.55840500   | 1.71210500  | 0.13007400  |
| C | -0.66108800  | -0.24099800 | 0.19994700  |
| C | -1.14748200  | -1.59210500 | 0.33645500  |
| C | -2.55841400  | -1.71208500 | 0.13002600  |
| C | -3.21437500  | -0.44205200 | -0.10231700 |
| S | -2.00310400  | 0.83955600  | -0.11911200 |
| C | -4.57151400  | -0.14035100 | -0.20311500 |
| S | -5.79124100  | -1.31326000 | 0.30189600  |
| C | -7.12209300  | -0.17924400 | 0.09483100  |
| C | -6.63257700  | 1.09257600  | -0.40766900 |
| C | -5.22036000  | 1.10136400  | -0.60274800 |
| C | -8.40019400  | -0.59656200 | 0.40628700  |
| C | 8.40023900   | 0.59650600  | 0.40629000  |
| C | -7.39971000  | 2.22300500  | -0.72723600 |
| C | -6.77482000  | 3.34509900  | -1.26106900 |
| C | -5.39597000  | 3.34214700  | -1.50323600 |
| C | -4.62128700  | 2.23208700  | -1.18644700 |
| C | -0.39761800  | -2.73722200 | 0.68270300  |
| C | -1.01069100  | -3.97673500 | 0.73687200  |
| C | -2.37750300  | -4.10789600 | 0.43909900  |
| C | -3.14653200  | -2.99332900 | 0.14517400  |
| C | 0.39754200   | 2.73723800  | 0.68250700  |
| C | 1.01059300   | 3.97676300  | 0.73668400  |
| C | 2.37743900   | 4.10792400  | 0.43908300  |
| C | 3.14651200   | 2.99335500  | 0.14527100  |
| C | 7.39967700   | -2.22300900 | -0.72730500 |
| C | 6.77475500   | -3.34505700 | -1.26119800 |
| C | 5.39590900   | -3.34205200 | -1.50337700 |
| C | 4.62125500   | -2.23198900 | -1.18652500 |
| C | -9.54834900  | 0.24157800  | 0.30461600  |
| N | -10.49466700 | 0.91574800  | 0.22626300  |
| C | -8.62339900  | -1.93196200 | 0.86205100  |
| N | -8.76449100  | -3.02841900 | 1.22791000  |
| C | 9.54836700   | -0.24166700 | 0.30458700  |
| N | 10.49465100  | -0.91588100 | 0.22620200  |
| C | 8.62348200   | 1.93189600  | 0.86206300  |

|   |             |             |             |
|---|-------------|-------------|-------------|
| N | 8.76460400  | 3.02834800  | 1.22792500  |
| H | -8.47055700 | 2.22780200  | -0.57486300 |
| H | -7.36827700 | 4.21786200  | -1.51168200 |
| H | -4.92523200 | 4.20836500  | -1.95637900 |
| H | -3.56829500 | 2.24432600  | -1.43341400 |
| H | 0.65095700  | -2.65705700 | 0.93613400  |
| H | -0.43007400 | -4.85204100 | 1.00809800  |
| H | -2.84236700 | -5.08801700 | 0.45122400  |
| H | -4.19311700 | -3.13258100 | -0.08787200 |
| H | -0.65106300 | 2.65708500  | 0.93581700  |
| H | 0.42992800  | 4.85207800  | 1.00777800  |
| H | 2.84230100  | 5.08804600  | 0.45126100  |
| H | 4.19312700  | 3.13262300  | -0.08762300 |
| H | 8.47052500  | -2.22784700 | -0.57493000 |
| H | 7.36818600  | -4.21782600 | -1.51184800 |
| H | 4.92515200  | -4.20822400 | -1.95658800 |
| H | 3.56826400  | -2.24416900 | -1.43349500 |

**B5-5TQ:**

|   |             |             |             |
|---|-------------|-------------|-------------|
| C | -8.85005400 | 0.52843600  | -0.66175700 |
| S | -7.47388200 | 1.61524200  | -0.82045000 |
| C | -6.32865600 | 0.43618000  | -0.15592400 |
| C | -7.05112600 | -0.76162200 | 0.25218900  |
| C | -8.43801700 | -0.72368600 | -0.05514200 |
| C | -4.96502500 | 0.69561900  | -0.15897100 |
| C | -4.24850800 | 1.92631200  | -0.43824100 |
| C | -2.83121700 | 1.75615200  | -0.51479900 |
| C | -2.39352900 | 0.41140000  | -0.21511500 |
| S | -3.79270800 | -0.60773000 | 0.07922400  |
| C | -1.09297000 | -0.09202400 | -0.05963900 |
| S | 0.26184600  | 0.99037800  | 0.22807600  |
| C | 1.42758500  | -0.30547300 | 0.45145500  |
| C | 0.75836800  | -1.57626000 | 0.32075200  |
| C | -0.63274900 | -1.45773200 | 0.00412500  |
| C | 2.79032500  | -0.01669500 | 0.61781200  |
| C | 3.42952000  | 1.22083400  | 0.99628700  |
| C | 4.85078400  | 1.18511400  | 0.89177900  |
| C | 5.36667100  | -0.09065900 | 0.43312000  |
| S | 4.01456300  | -1.21546400 | 0.22841400  |
| C | 6.65702600  | -0.45760700 | 0.08176000  |
| S | 7.89815500  | 0.77745900  | -0.19147400 |
| C | 9.08698800  | -0.38598900 | -0.76333400 |
| C | 8.54757900  | -1.73414100 | -0.70470400 |
| C | 7.21107000  | -1.77483700 | -0.21303100 |
| C | 10.32249600 | 0.07479800  | -1.17242400 |
| C | -6.54901600 | -1.88110900 | 0.93597100  |
| C | -7.36471300 | -2.96470400 | 1.25994000  |
| C | -8.73781300 | -2.94133200 | 0.90286000  |
| C | -9.25591700 | -1.81653500 | 0.26226100  |
| C | 2.80940000  | 2.37875100  | 1.50657700  |
| C | 3.54472700  | 3.49809400  | 1.87319800  |
| C | 4.96319100  | 3.46643700  | 1.76012900  |
| C | 5.58684200  | 2.31430400  | 1.29170700  |
| C | -4.79255100 | 3.21434600  | -0.61264000 |
| C | -3.96950200 | 4.28160700  | -0.93847200 |
| C | -2.58960800 | 4.09273600  | -1.11081300 |

|   |              |             |             |
|---|--------------|-------------|-------------|
| C | -2.02263200  | 2.84742700  | -0.89798000 |
| C | 1.31622600   | -2.86033900 | 0.50540400  |
| C | 0.54359000   | -3.98957000 | 0.30345800  |
| C | -0.79831300  | -3.87308100 | -0.10153000 |
| C | -1.38380100  | -2.62801900 | -0.24490700 |
| C | 9.21563900   | -2.92098300 | -1.04468900 |
| C | 8.57220800   | -4.14163300 | -0.87610000 |
| C | 7.27559800   | -4.19180200 | -0.35110300 |
| C | 6.59845700   | -3.02467300 | -0.01671100 |
| C | -9.64176700  | -4.10089200 | 1.23086900  |
| C | -6.78651300  | -4.14441500 | 1.99816800  |
| C | 2.84623200   | 4.71756900  | 2.41686500  |
| C | 5.79235500   | 4.65347300  | 2.17445200  |
| C | -10.08780700 | 0.95929200  | -1.09600100 |
| C | 10.61803900  | 1.47077400  | -1.10632200 |
| N | 10.82068900  | 2.61536900  | -1.03408600 |
| C | 11.35433500  | -0.77046300 | -1.67396700 |
| N | 12.20700700  | -1.44840900 | -2.08615700 |
| C | -11.26472600 | 0.15758300  | -1.03944500 |
| N | -12.23406000 | -0.48691800 | -0.99918000 |
| C | -10.23660800 | 2.27132200  | -1.64070700 |
| N | -10.32035300 | 3.34797100  | -2.07681300 |
| H | -5.51810500  | -1.91115900 | 1.26379300  |
| H | -10.31065100 | -1.79520000 | 0.02139600  |
| H | 1.73872800   | 2.39881400  | 1.66524500  |
| H | 6.66843700   | 2.29950700  | 1.27899700  |
| H | -5.84950100  | 3.39836400  | -0.47957000 |
| H | -4.40339400  | 5.26668100  | -1.07420300 |
| H | -1.96162300  | 4.92533300  | -1.40986200 |
| H | -0.96064100  | 2.72006100  | -1.05899600 |
| H | 2.34301200   | -2.97444500 | 0.82608800  |
| H | 0.98050300   | -4.97196500 | 0.44903200  |
| H | -1.38219700  | -4.76604300 | -0.29880500 |
| H | -2.41194800  | -2.56533600 | -0.57487600 |
| H | 10.22770300  | -2.89663900 | -1.42557600 |
| H | 9.08937600   | -5.05898400 | -1.13638200 |
| H | 6.79370600   | -5.15107100 | -0.19256400 |
| H | 5.61352100   | -3.10075700 | 0.42353000  |
| H | -9.28874400  | -5.02625200 | 0.76138000  |
| H | -9.67664700  | -4.28726600 | 2.31043200  |
| H | -10.66161000 | -3.91702400 | 0.88800200  |
| H | -7.30214600  | -4.31004000 | 2.95071600  |
| H | -6.89404500  | -5.06795200 | 1.41792100  |
| H | -5.72490300  | -4.00075300 | 2.21109500  |
| H | 3.18842700   | 4.95693500  | 3.42991800  |
| H | 3.04870900   | 5.60004200  | 1.79939400  |
| H | 1.76433700   | 4.57281100  | 2.45325500  |
| H | 5.52914800   | 5.54335900  | 1.59139100  |
| H | 5.62905700   | 4.90697400  | 3.22812800  |
| H | 6.85825400   | 4.46406700  | 2.03412400  |

**B6-6TQ:**

|   |             |             |             |
|---|-------------|-------------|-------------|
| S | 9.12164500  | -0.94548700 | -1.32297100 |
| C | 10.15598900 | 0.24604700  | -2.09776600 |
| C | 9.76280000  | 1.59015300  | -1.70839200 |

|   |              |             |             |
|---|--------------|-------------|-------------|
| C | 8.65102000   | 1.60707100  | -0.81819700 |
| C | 8.11710400   | 0.28064800  | -0.52233800 |
| C | 6.97806100   | -0.08690900 | 0.17066800  |
| C | 11.16616800  | -0.19211200 | -2.93144400 |
| S | 5.72912900   | 1.10594400  | 0.57481400  |
| C | 4.58609300   | -0.09675700 | 1.16491900  |
| C | 5.20792300   | -1.40309100 | 1.13932000  |
| C | 6.52350600   | -1.40063300 | 0.59489700  |
| C | 3.27611600   | 0.26657700  | 1.48815300  |
| C | 2.71198100   | 1.56789100  | 1.76004100  |
| C | 1.28756400   | 1.55593300  | 1.89548100  |
| C | 0.70551400   | 0.24575200  | 1.73087200  |
| S | 1.98314200   | -0.93125600 | 1.47645300  |
| C | -0.64303400  | -0.13741400 | 1.66288600  |
| S | -1.88474100  | 1.03423100  | 1.25404400  |
| C | -3.17510100  | -0.16245700 | 1.15466100  |
| C | -2.64494500  | -1.45795900 | 1.51121000  |
| C | -1.24109100  | -1.44436100 | 1.78929300  |
| C | -4.44612200  | 0.19070900  | 0.69238700  |
| C | -5.05483600  | 1.49563500  | 0.54899400  |
| C | -6.31932800  | 1.47035000  | -0.10550000 |
| C | -6.78509200  | 0.13152900  | -0.42762800 |
| S | -5.53606000  | -1.03399500 | 0.04853100  |
| C | -8.00403700  | -0.29364800 | -0.92484900 |
| S | -9.38301300  | 0.82058600  | -1.02501700 |
| C | -10.51165800 | -0.43992700 | -1.50183700 |
| C | -9.82438800  | -1.71380300 | -1.63356000 |
| C | -8.43199400  | -1.62520700 | -1.34563400 |
| C | -11.83770600 | -0.10616500 | -1.69483300 |
| C | 4.68284000   | -2.60433800 | 1.65269400  |
| C | 5.40202600   | -3.79210700 | 1.61333300  |
| C | 6.71340300   | -3.79176400 | 1.06458300  |
| C | 7.25252700   | -2.60230000 | 0.58355200  |
| C | -4.55218800  | 2.72688800  | 1.01263900  |
| C | -5.21845100  | 3.92313600  | 0.78026800  |
| C | -6.43173700  | 3.90832000  | 0.03976500  |
| C | -6.95937100  | 2.69143900  | -0.38135700 |
| C | 3.41309000   | 2.77445300  | 1.97125000  |
| C | 2.72537200   | 3.93450500  | 2.28114600  |
| C | 1.32583300   | 3.92220600  | 2.41577900  |
| C | 0.61504100   | 2.74898000  | 2.23909600  |
| C | 10.37994400  | 2.78955900  | -2.09793700 |
| C | 9.91383600   | 3.99672100  | -1.59083100 |
| C | 8.84987700   | 4.01738900  | -0.68189800 |
| C | 8.22382700   | 2.83859300  | -0.29259200 |
| C | -3.36651000  | -2.66001800 | 1.67593000  |
| C | -2.71468500  | -3.81504700 | 2.07184100  |
| C | -1.33553800  | -3.80139200 | 2.34361800  |
| C | -0.60860900  | -2.63121900 | 2.21883100  |
| C | -10.39278900 | -2.93470200 | -2.02946900 |
| C | -9.58305600  | -4.05649000 | -2.16431900 |
| C | -8.20663800  | -3.96564400 | -1.93011700 |
| C | -7.62990800  | -2.76468800 | -1.53093400 |
| C | 7.53160200   | -5.05618000 | 1.02836600  |
| C | 4.80618300   | -5.05724700 | 2.17531300  |
| C | -4.65320700  | 5.21928300  | 1.30167300  |
| C | -7.15489700  | 5.19128500  | -0.27712700 |
| C | -12.26215100 | 1.24669800  | -1.52207900 |

|   |              |             |             |
|---|--------------|-------------|-------------|
| N | -12.56859000 | 2.36062400  | -1.37422200 |
| C | 12.05178700  | 0.68042500  | -3.62770000 |
| N | 12.78319700  | 1.37998500  | -4.20433700 |
| C | 11.36253300  | -1.59221400 | -3.13445800 |
| N | 11.49228700  | -2.74146400 | -3.27241700 |
| C | -12.84455000 | -1.04505900 | -2.06263800 |
| N | -13.67930700 | -1.80000400 | -2.36273400 |
| H | 3.71143900   | -2.61305300 | 2.13038100  |
| H | 8.27479600   | -2.62267600 | 0.23053500  |
| H | -3.63667900  | 2.75883200  | 1.58906200  |
| H | -7.87856500  | 2.71592900  | -0.95056200 |
| H | 4.49388700   | 2.79756200  | 1.93344400  |
| H | 3.27531100   | 4.85474200  | 2.44878300  |
| H | 0.80170600   | 4.83246100  | 2.68771600  |
| H | -0.45376200  | 2.74888500  | 2.40684000  |
| H | 11.21998500  | 2.78286300  | -2.77926500 |
| H | 10.39247200  | 4.92318100  | -1.88978100 |
| H | 8.51229400   | 4.96139100  | -0.26638600 |
| H | 7.43059500   | 2.88774000  | 0.44076700  |
| H | -4.43906600  | -2.68366000 | 1.53853300  |
| H | -3.28134000  | -4.73118200 | 2.20223600  |
| H | -0.84283500  | -4.70683500 | 2.68222000  |
| H | 0.43802500   | -2.62859500 | 2.49267200  |
| H | -11.45088100 | -3.00865500 | -2.24135900 |
| H | -10.02188600 | -4.99915100 | -2.47355600 |
| H | -7.57535200  | -4.83688300 | -2.07231700 |
| H | -6.55680700  | -2.72079200 | -1.40532800 |
| H | 7.68131100   | -5.46512100 | 2.03417700  |
| H | 7.03174000   | -5.83549500 | 0.44178400  |
| H | 8.51416600   | -4.88242900 | 0.58539000  |
| H | 5.42172000   | -5.46575200 | 2.98463200  |
| H | 3.80370500   | -4.88174100 | 2.57205300  |
| H | 4.73392000   | -5.83781300 | 1.40941300  |
| H | -5.35995600  | 5.72295300  | 1.97065400  |
| H | -3.72663200  | 5.05368000  | 1.85598500  |
| H | -4.43790400  | 5.91879700  | 0.48588500  |
| H | -6.52036800  | 5.87562300  | -0.85183100 |
| H | -8.06151300  | 5.00535300  | -0.85622900 |
| H | -7.44387400  | 5.72153200  | 0.63758300  |

**B7-7TQ:**

|   |             |             |             |
|---|-------------|-------------|-------------|
| S | 11.54030600 | 0.54536800  | -0.44673600 |
| C | 12.68088100 | -0.73034000 | -0.84551300 |
| C | 11.97666900 | -1.91635100 | -1.30425000 |
| C | 10.56158600 | -1.75347800 | -1.31223600 |
| C | 10.11663800 | -0.45773800 | -0.80505700 |
| C | 8.84228000  | -0.00555200 | -0.52360200 |
| C | 14.03237100 | -0.48475800 | -0.69895100 |
| S | 7.45798300  | -1.11678300 | -0.51024300 |
| C | 6.31301000  | 0.09787100  | 0.06335100  |
| C | 7.01223200  | 1.35148200  | 0.26581000  |
| C | 8.38506900  | 1.31161500  | -0.10731200 |
| C | 4.95521700  | -0.19538000 | 0.17493200  |
| C | 4.27271900  | -1.46990100 | 0.12900200  |
| C | 2.84710100  | -1.35692000 | 0.09772600  |

|   |              |             |             |
|---|--------------|-------------|-------------|
| C | 2.37242500   | 0.00385500  | 0.20287400  |
| S | 3.75013800   | 1.09421300  | 0.26608500  |
| C | 1.06411400   | 0.48811100  | 0.33941600  |
| S | -0.24815800  | -0.57698400 | 0.83092600  |
| C | -1.44614200  | 0.70892200  | 0.92311200  |
| C | -0.81834500  | 1.96417200  | 0.58867300  |
| C | 0.56187700   | 1.83630700  | 0.23075400  |
| C | -2.79054400  | 0.41566700  | 1.18869100  |
| C | -3.38326900  | -0.77742500 | 1.74545400  |
| C | -4.80898100  | -0.77674200 | 1.71442800  |
| C | -5.37727800  | 0.42502000  | 1.14513700  |
| S | -4.06536900  | 1.53370500  | 0.72367400  |
| C | -6.69748100  | 0.73461300  | 0.83187800  |
| S | -7.91800000  | -0.53336800 | 0.71191900  |
| C | -9.16620000  | 0.54228200  | 0.05182900  |
| C | -8.65166100  | 1.90515000  | 0.04245600  |
| C | -7.29504100  | 2.00844200  | 0.47127900  |
| C | 6.48920400   | 2.54163200  | 0.80622200  |
| C | 7.25244300   | 3.69948700  | 0.90293600  |
| C | 8.59180300   | 3.68754700  | 0.43187000  |
| C | 9.13259200   | 2.50050800  | -0.05481900 |
| C | -2.71441300  | -1.85835000 | 2.35518200  |
| C | -3.40568800  | -2.93377600 | 2.89501200  |
| C | -4.82893000  | -2.93610700 | 2.85830100  |
| C | -5.49937600  | -1.86258200 | 2.28596800  |
| C | 4.85712700   | -2.75411000 | 0.14002600  |
| C | 4.06291800   | -3.88394800 | 0.03309900  |
| C | 2.66980000   | -3.76709400 | -0.10017800 |
| C | 2.06603400   | -2.52198000 | -0.06309700 |
| C | 12.55736100  | -3.11775800 | -1.74050500 |
| C | 11.74366000  | -4.14379000 | -2.20626900 |
| C | 10.35619100  | -3.97304300 | -2.26223700 |
| C | 9.76563300   | -2.79125200 | -1.82742000 |
| C | -1.40554600  | 3.24833900  | 0.61605100  |
| C | -0.67648900  | 4.35713200  | 0.22590900  |
| C | 0.65064700   | 4.21761800  | -0.21716200 |
| C | 1.26596500   | 2.97867000  | -0.21139500 |
| C | -9.36386700  | 3.07835600  | -0.26754200 |
| C | -8.74439000  | 4.31778800  | -0.18150600 |
| C | -7.41417200  | 4.41905300  | 0.24494600  |
| C | -6.69924800  | 3.27939900  | 0.58179400  |
| C | 9.43398800   | 4.93628600  | 0.47258100  |
| C | 6.65745300   | 4.95061600  | 1.49697100  |
| C | -2.65338400  | -4.06825300 | 3.54262900  |
| C | -5.60786100  | -4.07537000 | 3.46365100  |
| C | -10.36046900 | 0.04155000  | -0.42648700 |
| C | -10.94004200 | -1.29294700 | -0.29488800 |
| C | -12.11664100 | -1.48565700 | -1.07362700 |
| C | -12.51528500 | -0.29316000 | -1.80366000 |
| S | -11.40584900 | 1.02868300  | -1.47336100 |
| C | -13.57820300 | -0.07365800 | -2.65807700 |
| C | -10.49548100 | -2.34166000 | 0.52831200  |
| C | -11.17120300 | -3.55689300 | 0.53622100  |
| C | -12.30190000 | -3.75292700 | -0.26438600 |
| C | -12.78350300 | -2.72121800 | -1.06117200 |
| C | 14.47681800  | 0.79433200  | -0.24481500 |
| N | 14.80100000  | 1.85012900  | 0.12531900  |
| C | 15.04665000  | -1.44695800 | -0.97400900 |

|   |              |             |             |
|---|--------------|-------------|-------------|
| N | 15.88845200  | -2.22169800 | -1.19358600 |
| C | -13.76667900 | 1.21568000  | -3.24274800 |
| N | -13.89037400 | 2.28000700  | -3.69952600 |
| C | -14.52841700 | -1.07447600 | -3.01284000 |
| N | -15.31328600 | -1.88090000 | -3.31404100 |
| H | 5.47814100   | 2.56882600  | 1.19110400  |
| H | 10.15292200  | 2.52627900  | -0.41240600 |
| H | -1.63652500  | -1.84554200 | 2.45358900  |
| H | -6.58091300  | -1.86009200 | 2.32475500  |
| H | 5.92531900   | -2.87431300 | 0.25811600  |
| H | 4.52534200   | -4.86559600 | 0.04364400  |
| H | 2.06065500   | -4.65601500 | -0.22701800 |
| H | 0.99350200   | -2.45525200 | -0.18645900 |
| H | 13.63100700  | -3.24835300 | -1.72851400 |
| H | 12.19283400  | -5.07075300 | -2.54662200 |
| H | 9.72962200   | -4.76468700 | -2.66055800 |
| H | 8.69529800   | -2.67725000 | -1.93002700 |
| H | -2.42193600  | 3.38178900  | 0.96105400  |
| H | -1.13753500  | 5.33902800  | 0.25232500  |
| H | 1.19964000   | 5.08748400  | -0.56264400 |
| H | 2.28102500   | 2.89474700  | -0.57527000 |
| H | -10.40992300 | 3.04232000  | -0.53823300 |
| H | -9.30837100  | 5.21308700  | -0.42126000 |
| H | -6.94697000  | 5.39377800  | 0.33928600  |
| H | -5.69530300  | 3.38626500  | 0.96989600  |
| H | 8.97410500   | 5.74735100  | -0.10359200 |
| H | 9.55086000   | 5.30452600  | 1.49835600  |
| H | 10.43149700  | 4.75753100  | 0.06632200  |
| H | 7.23120300   | 5.29235500  | 2.36581800  |
| H | 6.65784400   | 5.77568500  | 0.77536700  |
| H | 5.62689500   | 4.78579800  | 1.81954600  |
| H | -2.93268000  | -4.18650300 | 4.59577300  |
| H | -2.86941800  | -5.02339300 | 3.05018500  |
| H | -1.57442400  | -3.90437400 | 3.49885700  |
| H | -5.38016300  | -4.19605900 | 4.52888200  |
| H | -6.68394800  | -3.91610400 | 3.36697700  |
| H | -5.36316800  | -5.02766000 | 2.97916400  |
| H | -9.64827700  | -2.21276800 | 1.18777300  |
| H | -10.81909500 | -4.35712200 | 1.17933000  |
| H | -12.81905100 | -4.70648300 | -0.25278900 |
| H | -13.67346000 | -2.87433800 | -1.65647400 |

#### Part. 4. References

1. Gaussian 16, Revision B.01, M. J. Frisch, G. W. Trucks, H. B. Schlegel, G. E. Scuseria, M. A. Robb, J. R. Cheeseman, G. Scalmani, V. Barone, G. A. Petersson, H. Nakatsuji, X. Li, M. Caricato, A. V. Marenich, J. Bloino, B. G. Janesko, R. Gomperts, B. Mennucci, H. P. Hratchian, J. V. Ortiz, A. F. Izmaylov, J. L. Sonnenberg, D. Williams-Young, F. Ding, F. Lipparini, F. Egidi, J. Goings, B. Peng, A. Petrone, T. Henderson, D. Ranasinghe, V. G. Zakrzewski, J. Gao, N. Rega, G. Zheng, W. Liang, M. Hada, M. Ehara, K. Toyota, R. Fukuda, J. Hasegawa, M. Ishida, T. Nakajima, Y. Honda, O. Kitao, H. Nakai, T. Vreven, K. Throssell, J. A., Jr. Montgomery, J. E. Peralta, F. Ogliaro, M. J. Bearpark, J. J. Heyd, E. N. Brothers, K. N. Kudin, V. N. Staroverov, T. A. Keith, R. Kobayashi, J. Normand, K. Raghavachari, A. P. Rendell, J. C. Burant, S. S. Iyengar, J. Tomasi, M. Cossi, J. M. Millam, M. Klene, C. Adamo, R. Cammi, J. W. Ochterski, R. L. Martin, K. Morokuma, O. Farkas, J. B. Foresman, D. J. Fox, Gaussian, Inc., Wallingford CT, 2016.



2. A. D. Becke, *J. Chem. Phys.* 1993, **98**, 1372.
3. M. M. Francl, W. J. Pietro, W. J. Hehre, J. S. Binkley, M. S. Gordon, D. J. Defrees and J. A. Pople, *J. Chem. Phys.* 1982, **77**, 3654.
4. D. Casanova and M. Head-Gordon, *Phys. Chem. Chem. Phys.* 2009, **11**, 9779.
5. Y. Shao, Z. Gan, E. Epifanovsky, A. T.B. Gilbert, M. Wormit, J. Kussmann, A.W. Lange, A. Behn, J. Deng, X. Feng, D. Ghosh, M. Goldey, P. R. Horn, L. D. Jacobson, I. Kaliman, R. Z. Khaliullin, T. Kuś, A. Landau, J. Liu, E. I. Proynov, Y. M. Rhee, R. M. Richard, M. A. Rohrdanz, R. P. Steele, E.J. Sundstrom, H. L. Woodcock III, P.I.M. Zimmerman, D. Zuev, B. Albrecht, E. Alguire, B. Austin, G. J. O. Beran, Y. A. Bernard, E. Berquist, K. Brandhorst, K. B. Bravaya, S. T. Brown, D. Casanova, C.Chang, Y. Chen, S. H. Chien, K. D. Closser, D. L. Crittenden, M.Diedenhofen, R. A. DiStasio Jr., H. Do, A.D. Dutoi, R. G. Edgar, S. Fatehi, L. Fusti-Molnar, A. Ghysels, A. Golubeva-Zadorozhnaya, J. Gomes, M. W.D. Hanson-Heine, P. H.P. Harbach, A. W. Hauser, E.G. Hohenstein, Z. C. Holden, T. C. Jagau, H. Ji, B. Kaduk, K.I Khistyayev, J. Kim, J. Kim, R. A. King, P. Klunzinger, D. Kosenkov, T. Kowalczyk, C. M. Krauter, K.U. Lao, A. D. Laurent, K. V. Lawler, S. V. Levchenko, C. Yeh Lin, F. Liu, E. Livshits, R. C. Lochan, A. Luenser, P.Manohar, S. F. Manzer, S.Mao, N. Mardirossian, Al. V. Marenich, S. A. Maurer, N. J. Mayhall, E.Neuscammen, C. M. Oana, R. Olivares-Amaya, D. P. O'Neill, J.A. Parkhill, T. M. Perrine, R. Peverati, A. Prociuk, D. R. Rehn, E. Rosta, N. J. Russ, S. M. Sharada, S. Sharma, D. W. Small, A. Sodt, T. Stein, D. Stück, Y. Su, A. J.W. Thom, T. Tsuchimochi, V. Vanovschi, L. Vogt, O. Vydrov, T. Wang, M. A. Watson, J. Wenzel, A. White, C. F. Williams, J. Yang, S. Yeganeh, S. R. Yost, Z.You, I. Y. Zhang, X. Zhang, Y.Zhao, B. R. Brooks, G. K.L. Chan, D. M. Chipman, C. J. Cramer, W. A. Goddard III, M.S. Gordon, W. J. Hehre, A. Klamt, H. F. Schaefer III, M.I.W. Schmidt, C. D. Sherrill, D. G. Truhlar, A. Warshel, X. Xu, A. Aspuru-Guzik, R. Baer, A. T. Bell, N. A. Besley, J.Chai, A. Dreuw, B. D. Dunietz, T. R. Furlani, S. R. Gwaltney, C.Hsu, Y. Jung, J.Kong, D. S. Lambrecht, W. Liang, C.Ochsenfeld and A. Vitaly, *Mol. Phys.* 2015, **113**, 184.
6. R. E. Stratmann, G. E. Scuseria, and M. J. Frisch, *J. Chem. Phys.* 1998, **109**, 8218.
7. G. Scalmani, M. J. Frisch, B. Mennucci, J. Tomasi, R. Cammi, and V. Barone, *J. Chem. Phys.* 2006, **124**, 1.
